# Supplementary material for: Assessing the Orthogonality of Phage-Encoded RNA Polymerases for Tailored Synthetic Biology Applications in Pseudomonas Species
Source: MDPI journal article supplement (doi:10.3390/ijms24087175), 2023-04-13
Supplement: s1 [file s1]

## Supporting information

### Supplementary Experiments

Phage promoters and their native 5'UTR are co-evolved to yield high expression levels

To validate the expression levels of the phage RNAPs and promoters in combination with BCD2, all phage promoters were connected to BCD2 by a GGGCAG linker and cloned together with msfGFP into pBGDes. The GGGCAG linker contains the GCAG position tag required for SEVAtile shuffling and a double G directly following the TSS of the promoter. This is known to be important for proper transcription initiation of the T7 promoter (Figure 5) [21,22]. The resulting vectors were introduced together with the corresponding phage RNAP in *P. putida* KT2440.

Unexpectedly, the replacement of the MCP 5'UTR by BCD2 resulted in a significant drop in msfGFP fluorescence output for all phage RNAPs except for  $P_{\text{phi15}}$  ( $P < 0.05$ ) (Figure S1). For Pf-10 and 67PfluR64PP, almost no fluorescent intensity was detected at all, indicating that the confirmed phage promoter is not sufficient for efficient transcription by these phage polymerases. A first hypothesis for this observation led us to the unwinding region of the phage promoters. As indicated in Figure 4, the last four nucleotides of the promoters are predicted to play an important role in DNA unwinding [22]. Interestingly, this region contains three A/T nucleotides for both the Pf-10 and 67PfluR64PP promoter, while the other promoters have four A/T nucleotides. Therefore, it is reasonable to assume that four consecutive A/T nucleotides are required for proper DNA unwinding and transcription initiation of these promoters, as was confirmed for the T7 promoter in previous research [18,22].

To test this hypothesis, the GGGCAG linker from the previous construct was replaced by the two first nucleotides of the corresponding phage MCP 5'UTR followed by GCAG. In this way, all phage promoter-UTR constructs contain four consecutive A/T nucleotides, which will potentially increase the fluorescent output. This trend could indeed be observed for Pf-10 and 67PfluR64PP, but the msfGFP levels still remain about fourfold lower than the levels observed for the full MCP 5'UTR (Figure S1). For T7, phi15 and PPPL-1, no significant difference in msfGFP output was observed between constructs containing the GGGCAG linker or NNGCAG linker. These results indicate that an intact unwinding region of four consecutive A/T nucleotides is important for T7-like promoters, but does not fully explain the significant difference in fluorescence intensity between the MCP 5'UTR and BCD2 for PPPL-1, Pf-10 and 67PfluR64PP (Figure 5).

When analyzing the MCP 5'UTR further, it can be observed that all T7-like phage promoter regions in this paper contain a 13-nt stretch without any thymidine residue directly downstream of the TSS. The conservation of this T-less stretch in diverse T7-like phages could indicate that this region is important for efficient transcription by the phage RNAP. Therefore, the previous linkers are now extended with the thirteen first nucleotides of the corresponding phage's MCP 5'UTR to include the T-less stretch. The addition of the T-less stretch has a marked influence on the msfGFP expression levels of Pf-10 and 67PfluR64PP, while the effect on T7, phi15 and PPPL-

1 is much less pronounced (Figure 5Error! Reference source not found.). In case of 67PfluR64PP, the fluorescence intensity is sevenfold higher compared to the N<sub>13</sub>-GCAG-BCD2 UTR and almost twice as high as the MCP 5'UTR. However, for all other phages the MCP 5'UTR still outperforms all UTRs containing BCD2. These results once again highlight that the phage promoter and MCP 5'UTR have been evolutionarily optimized to generate high levels of transcription together and that splitting these two parts to use them separately in synthetic circuitry is not straightforward [27].

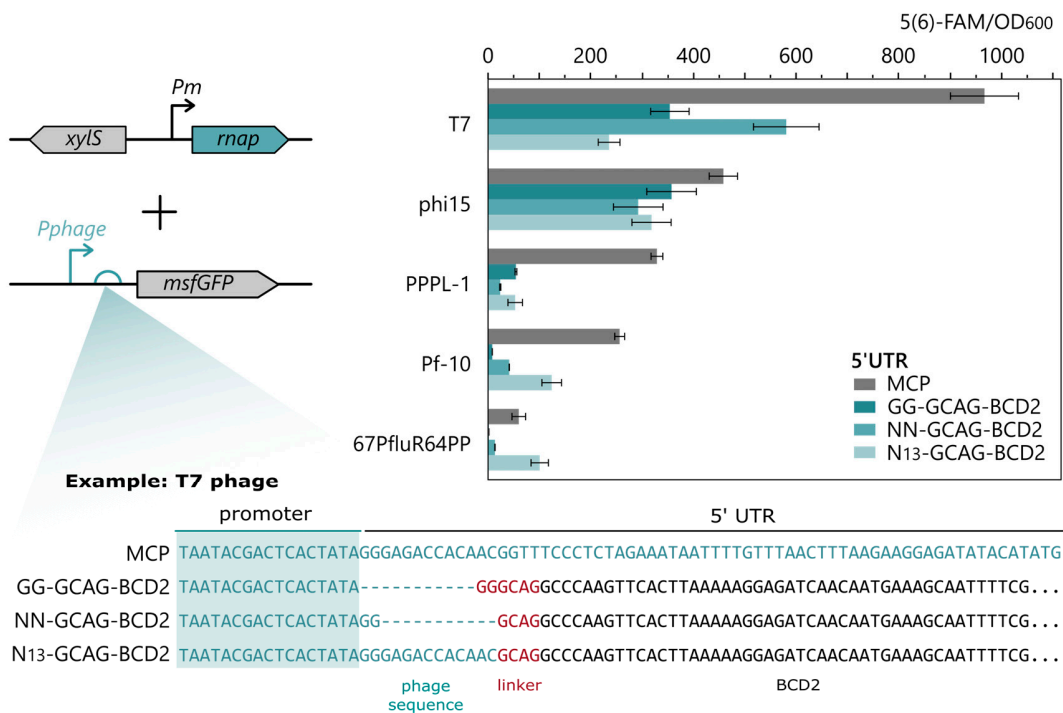

**Figure S1.** The sequence downstream of T7-like phage promoters highly impact transcription efficiency. For T7-like phages T7, phi15, PPPL-1, Pf-10 and 67PfluR64PP, their confirmed promoter was paired with different 5'UTRs: 1) the full 5'UTR of the corresponding phage's major capsid protein (MCP), 2) the standardized UTR BCD2, linked to the promoter by GGGCAG, 3) BCD2, linked to the promoter by the first two nucleotides of the corresponding phage's MCP and GCAG, 4) BCD2, linked to the promoter by the first thirteen nucleotides of the corresponding phage's MCP and GCAG. The combinations were cloned into pBGDes and introduced in *P. putida* KT2440 together with pSTDes3 carrying the corresponding phage RNAP. Bars represent the mean fluorescent intensity of four biological replicates after 6h of induction with 0.3 3mBz, expressed as equivalent 5(6)-FAM replicates and normalized for OD<sub>600</sub>. Error bars represent the standard error.

## Supplementary Figures

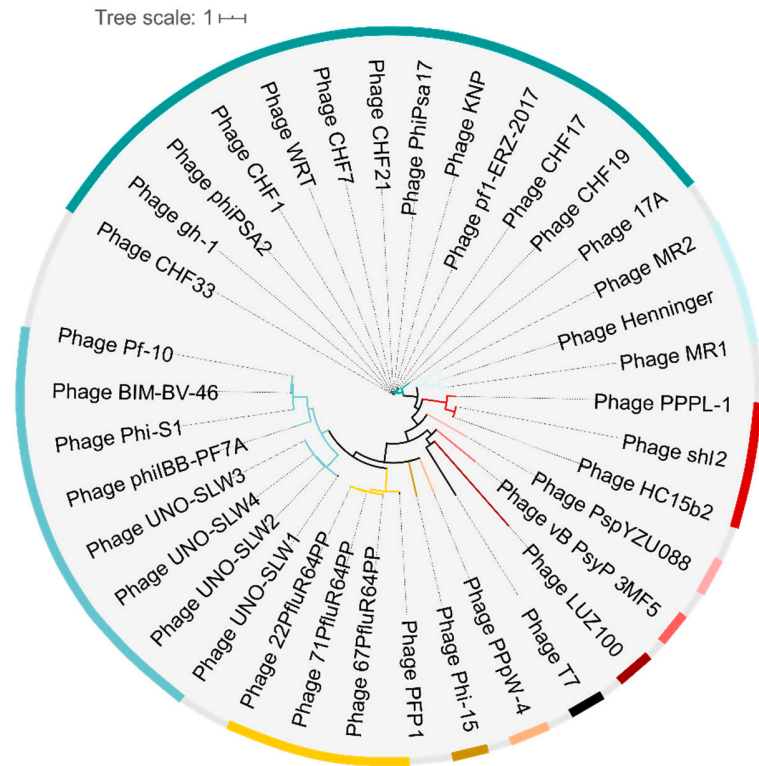

**Figure S2.** Phylogenetic tree (ClustalOmega) of T7-like *Pseudomonas* phages and coliphage T7, based on the RNAP sequence. Based on this tree, the phages can be subdivided into eleven different clades, indicated by different colors. The tree scale represents the phylogenetic distance between sequences.

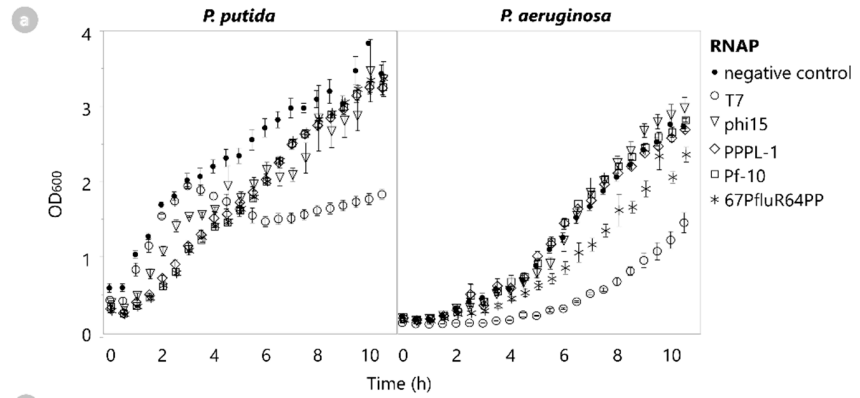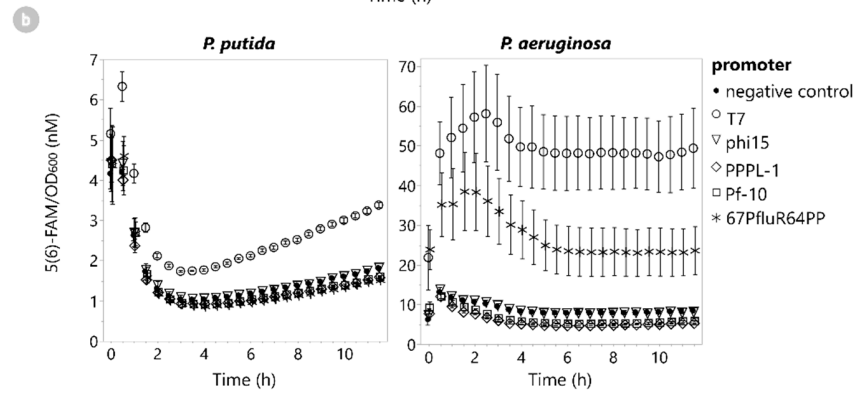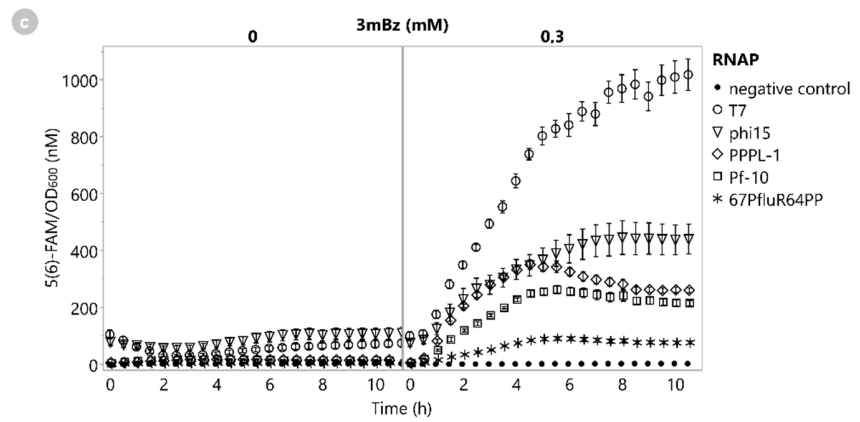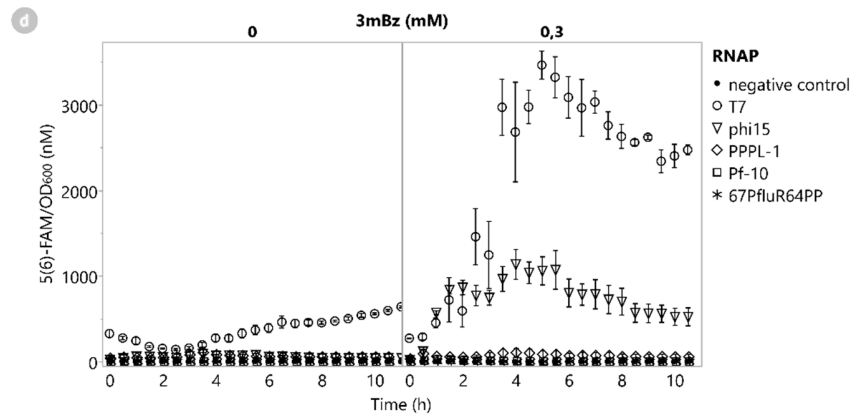

**Figure S3.** (a) Effect of phage RNAP expression on cell growth of *P. putida* KT2440 and *P. aeruginosa* PAO1. All *P. putida* and *P. aeruginosa* strains RX (negative control), RA0 (T7), RB0 (phi15), RC0 (PPPL-1), RD0 (Pf-10) and RE0 (67PfluR64PP) were induced with 1 mM 3mBz, after which the OD<sub>600</sub> was measured every 15 minutes for 12 hours. Markers and error bars represent the mean value and standard error of four biological replicates every 30 minutes. (b) Recognition of phage promoter by host RNAP of *P. putida* and *P. aeruginosa*. All *P. putida* and *P. aeruginosa* strains pX (negative control), pA0 (T7), pB0 (phi15), pC0 (PPPL-1), pD0 (Pf-10) and pE0 (67PfluR64PP) were monitored for 12h, with OD<sub>600</sub> and msfGFP measurements every 15 minutes. Markers and error bars represent the mean value and standard error of four biological replicates every 30 minutes. (c,d) T7-like phage RNAPs generate high msfGFP expression levels from their putative phage promoter in *P. putida* KT2440 (2) and *P. aeruginosa* PAO1 (3). *P. putida* and *P. aeruginosa* strains pXRX (negative control), pA0RA0 (T7), pB0RB0 (phi15), pC0RC0 (PPPL-1), pD0RD0 (Pf-10) and pE0RE0 (67PfluR64PP) were induced with 0.3 mM 3mBz, after which the OD<sub>600</sub> and fluorescent intensity was measured every 15 minutes for 12 hours. The fluorescent intensity was normalized for OD and expressed as equivalent 5(6)-FAM concentration (nM). Markers and error bars represent the mean value and standard error of four biological replicates every 30 minutes.

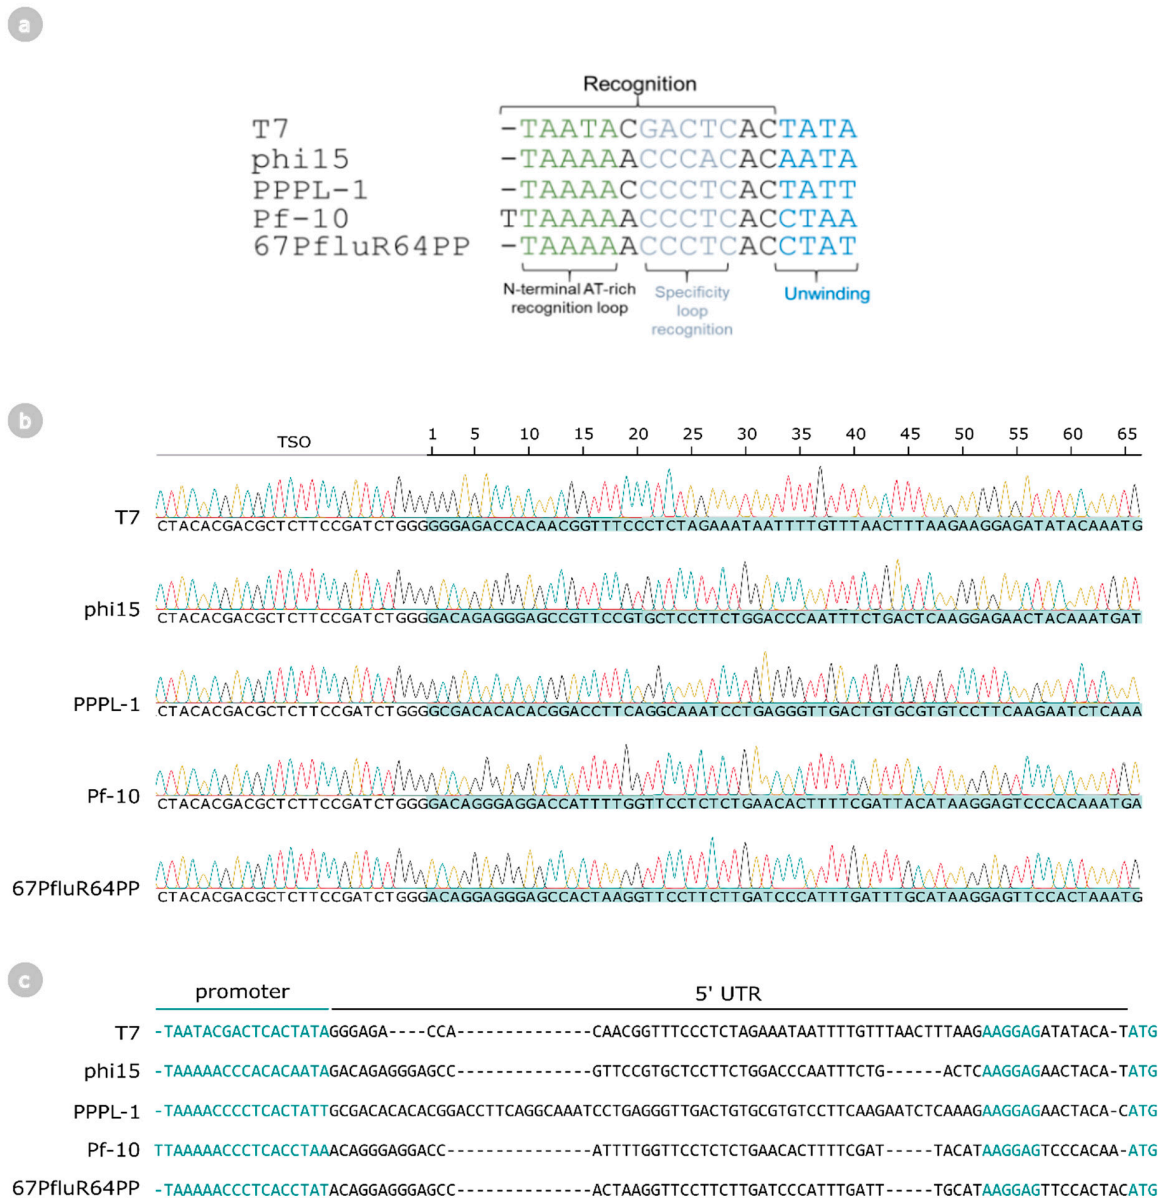

**Figure S1.** a) Distinct promoter regions of T7-like promoters. The T7 promoter consist of three main regions, 1) an N-terminal AT-rich recognition loop, 2) a specificity loop and 3) an unwinding region. b) Transcription start site (TSS) determination of phage terminators with 5'-capping RACE. The template switching oligonucleotide (TSO) is directly linked to the 5' terminus of the mRNA transcript and indicates the TSS of the phage promoter. c) Clustal-omega alignment of the validated promoter and 5' UTR of the phages' major capsid protein (MCP 5'UTR).

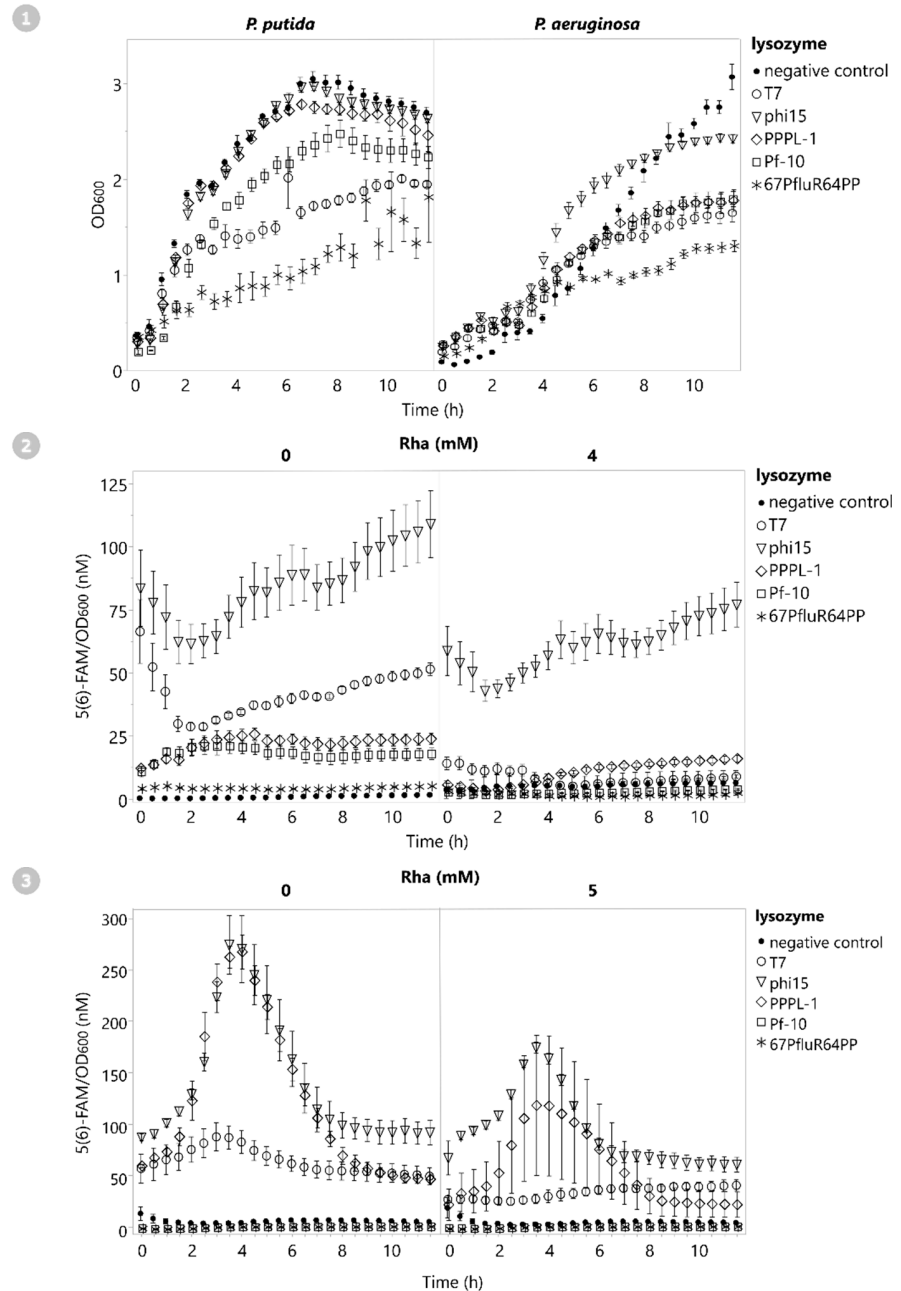

**Figure S2.** 1) Toxicity assay of phage lysozymes in *P. putida* KT2440 and *P. aeruginosa* PAO1. *P. putida* and *P. aeruginosa* strains LXO (negative control), LA0 (T7), LB0 (phi15), LC0 (PPPL-1), LD0 (Pf-10) and LE0 (67PfluR64PP) were induced with 10 mM Rha at OD<sub>600</sub> 0.3, after which cell growth was monitored every half hour for 12h. Datapoints represent the mean OD<sub>600</sub> value of four biological replicates. Error bars represent the standard error. 2) Fluorescence assay to analyze the inhibitory effect of the phage lysozyme on its corresponding phage RNAP. *P. putida* strains pXRXLX (negative control), pA0RA0LA0 (T7), pB0RB0LB0 (phi15), pC0RC0LC0 (PPPL-1), pD0RD0LD0 (Pf-10) and pE0RE0LE0 (67PfluR64PP) were induced with 4 mM Rha, after which the fluorescence intensity and cell growth is monitored every half hour for 12h. Datapoints represent the mean 5(6)-FAM/OD<sub>600</sub> value of four biological replicates. Error bars represent the standard error. 3) Fluorescence assay to analyze

the inhibitory effect of the phage lysozyme on its corresponding phage RNAP. *P. aeruginosa* strains pXRXLX (negative control), pA0RA0LA0 (T7), pB0RB0LB0 (phi15), pC0RC0LC0 (PPPL-1), pD0RD0LD0 (Pf-10) and pE0RE0LE0 (67PfluR64PP) were induced with 5 mM Rha, after which the fluorescence intensity and cell growth is monitored every half hour for 12h. Datapoints represent the mean 5(6)-FAM/OD<sub>600</sub> value of four biological replicates. Error bars represent the standard error.

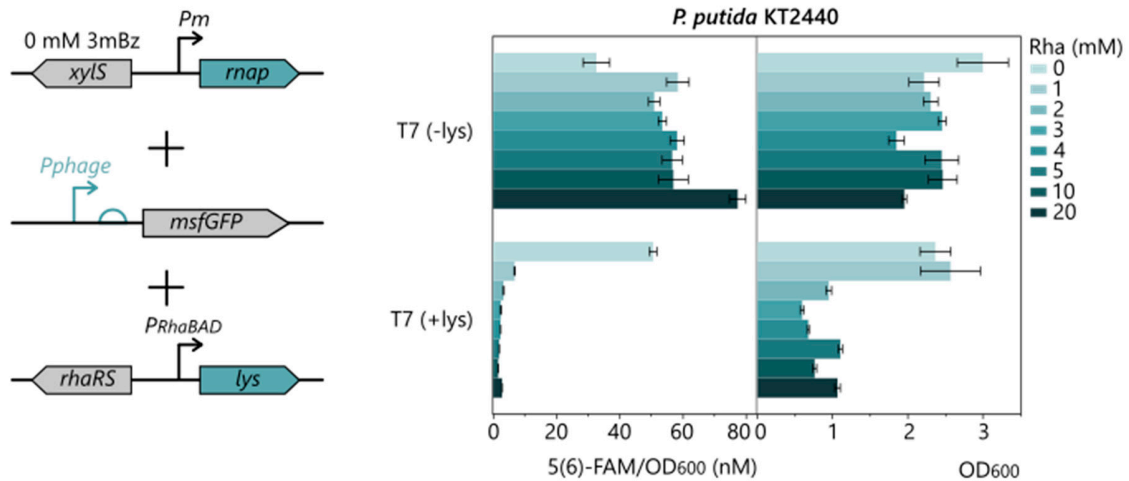

**Figure S3.** Preliminary assay to determine the ideal rhamnose concentration for induction of phage lysozymes. *P. putida* strains pA0RA0 (T7(-lys)) and pA0RA0LA0 (T7(+lys)) were induced with 0-20 mM Rha for 12h. Bars and error bars represent the mean 5(6)-FAM/OD<sub>600</sub> value and standard error of three technical replicates.

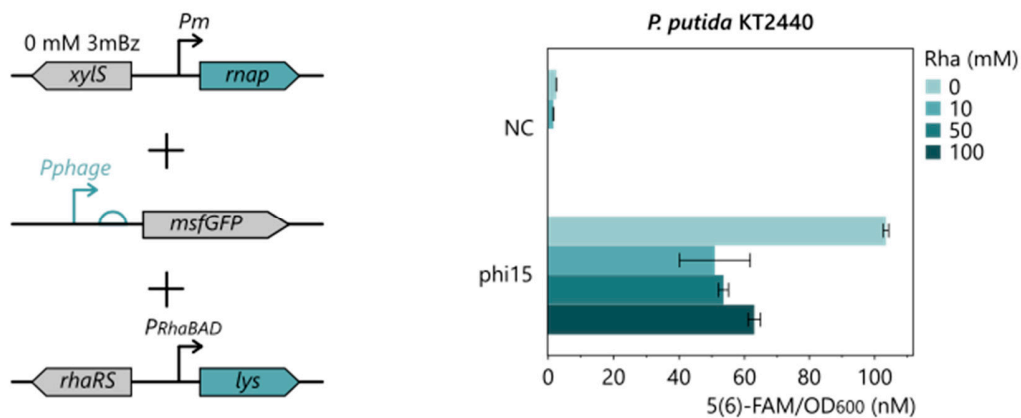

**Figure S4.** Fluorescence assay to analyze the inhibitory effect of the phi15 lysozyme on its corresponding phage RNAP under different inducer concentrations. *P. putida* strains pXRXLX (negative control) and pB0RB0LB0 (phi15) were induced with 0-100 mM Rha for 12h. Bars and error bars represent the mean 5(6)-FAM/OD<sub>600</sub> value and standard error of four biological replicates.



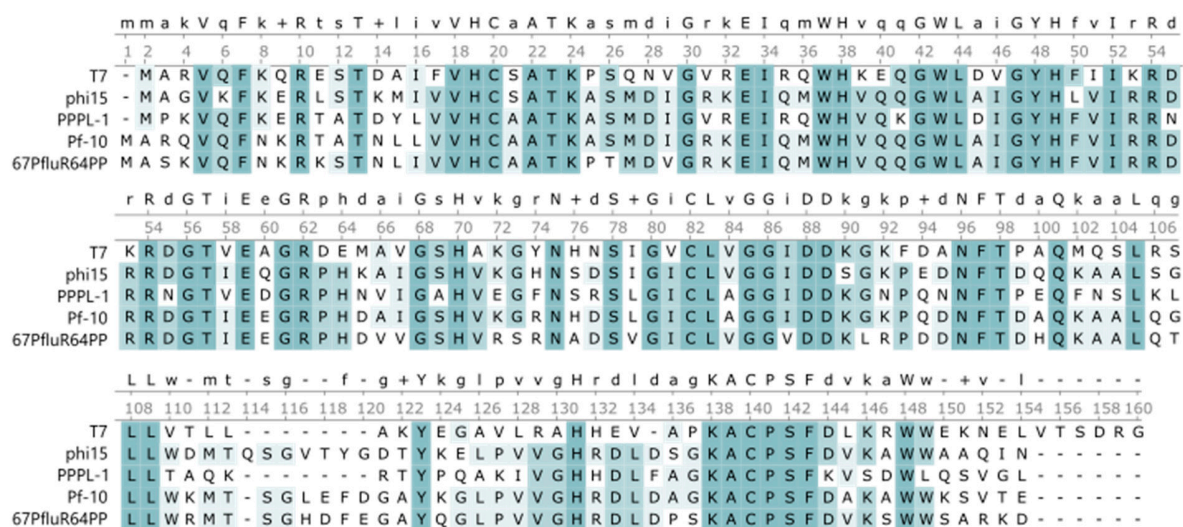

**Figure S5.** ClustalOmega alignment of phage lysozyme AA sequences. Darker colors indicate higher levels of conservation.

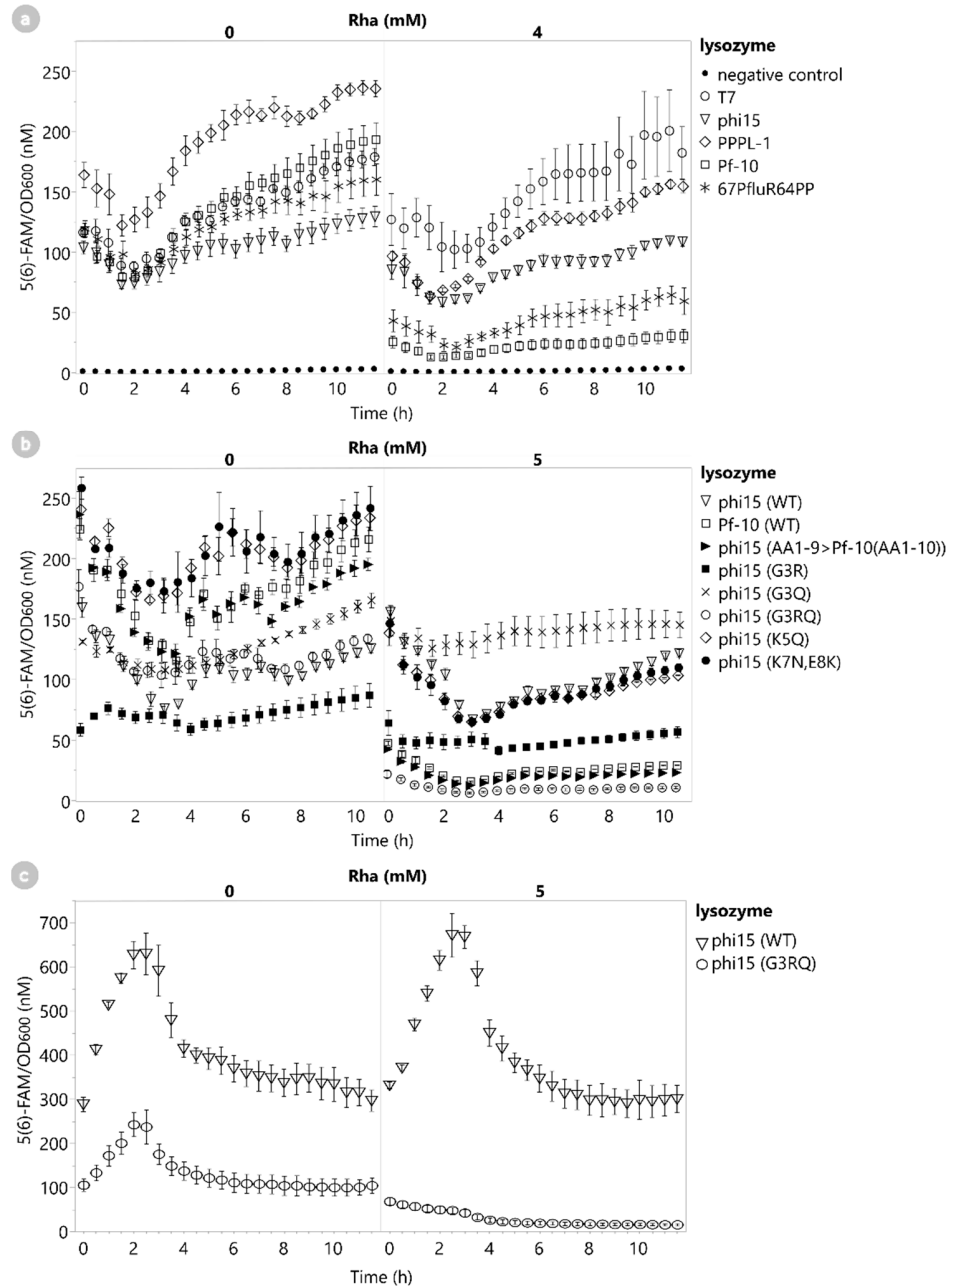

**Figure S6.** a) Fluorescence intensity assay to analyze the inhibitory effect of different phage lysozyme on phi15 RNAP. *P. putida* strains pXRXLX (negative control), pB0RB0LA0 (T7), pB0RB0LB0 (phi15), pB0RB0LC0 (PPPL-1), pB0RB0LD0 (Pf-10) and pB0RB0LE0 (67PfluR64PP) were induced with 4 mM Rha at OD<sub>600</sub> 0.3, after which the fluorescence intensity and cell growth is monitored every half hour for 12h. Datapoints represent the mean 5(6)-FAM/OD<sub>600</sub> value of four biological replicates. Error bars represent the standard error. b) Fluorescence assay to assess the inhibitory strength of different phi15 lysozyme mutants on phi15 RNAP. *P. putida* strains pB0RB0LB0 (phi15(WT)), pB0RB0LD0 (Pf-10(WT)), pB0RB0LB1 (phi15(AA1-9>Pf10(AA1-10))), pB0RB0LB2 (phi15(G3R)), pB0RB0LB3 (phi15(G3Q)), pB0RB0LB4 (phi15(G3RQ)), pB0RB0LB5 (phi15(K5Q)) and pB0RB0LB6 (phi15(K7N,E8K)) were induced with 5 mM Rha at OD<sub>600</sub> 0.3, after which the fluorescence intensity and cell

growth is monitored every half hour for 12h. Datapoints represent the mean 5(6)-FAM/OD<sub>600</sub> value of four biological replicates. Error bars represent the standard error.

c) Fluorescence assay to assess the inhibitory strength of phi15 lysozyme mutant G3RQ on phi15 RNAP. *P. aeruginosa* strains pB0RB0LB0 (phi15(WT)) and pB0RB0LB4 (phi15(G3RQ)) were induced with 5 mM Rha at OD<sub>600</sub> 0.3, after which the fluorescence intensity and cell growth is monitored every half hour for 12h. Datapoints represent the mean 5(6)-FAM/OD<sub>600</sub> value of four biological replicates. Error bars represent the standard error.

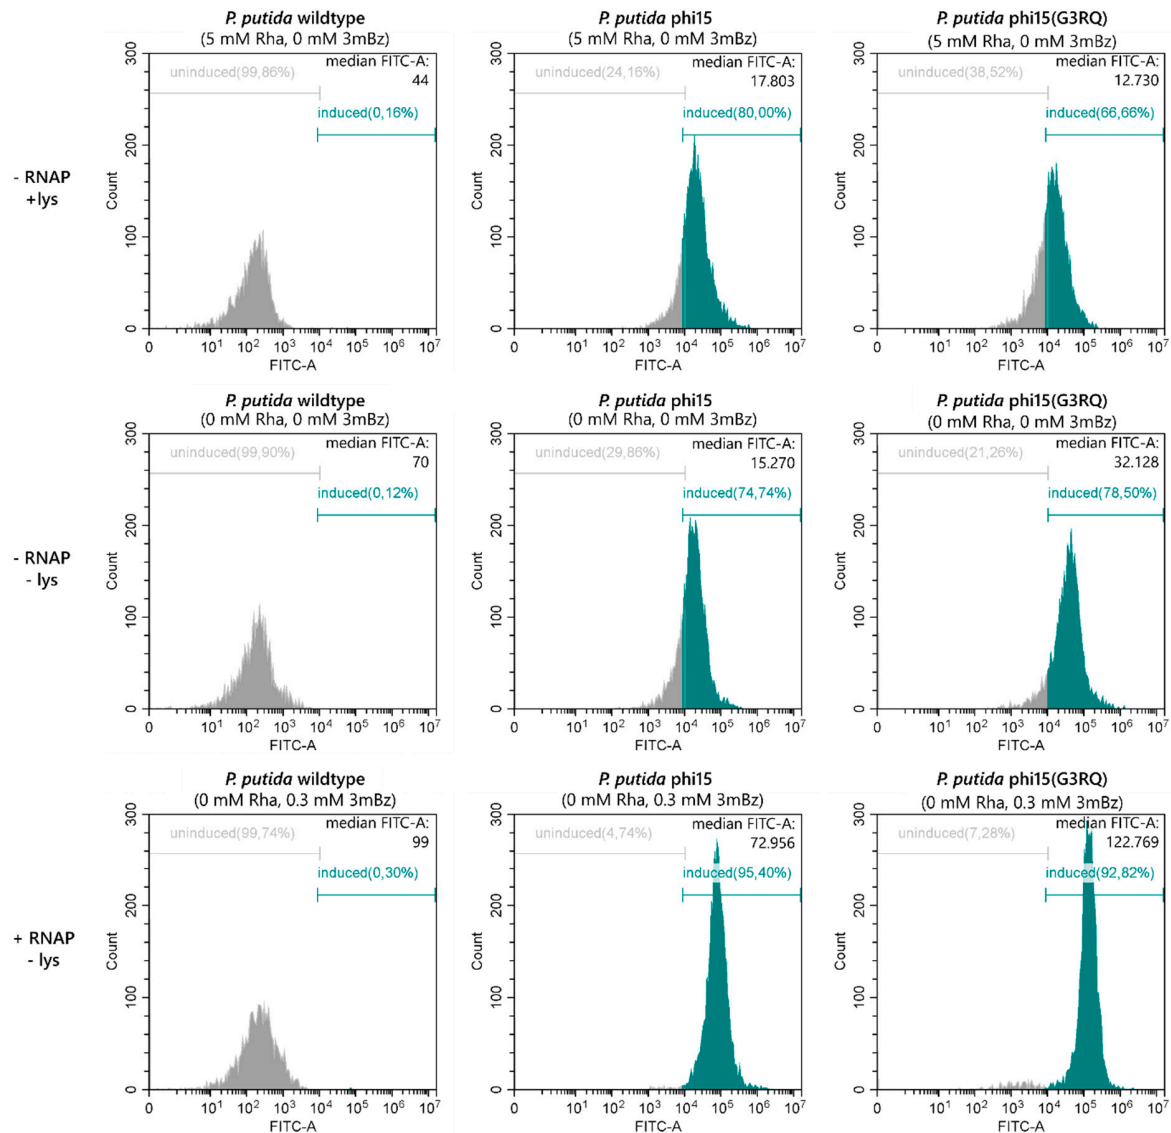

**Figure S7.** Flow cytometry data of strains *P. putida* KT2440 (wildtype), *P. putida* KT2440 with the phi15 RNAP, phi15 reporter construct and phi15 lysozyme (phi15) and *P. putida* KT2440 with the phi15 RNAP, phi15 reporter construct and phi15 lysozyme (G3RQ) mutant (phi15(G3RQ)). Strains were induced overnight with 5 mM Rha (+lys) or 0.3 mM 3mBz (+RNAP), after which 5,000 cells were analyzed with flow cytometry for FITC-A as described in the method section. Cells with a FITC-A level

above  $10^4$  are considered induced (green), whereas cells below  $10^4$  are uninduced. The median FITC-A depicts the median FITC-A value of the entire cell population.

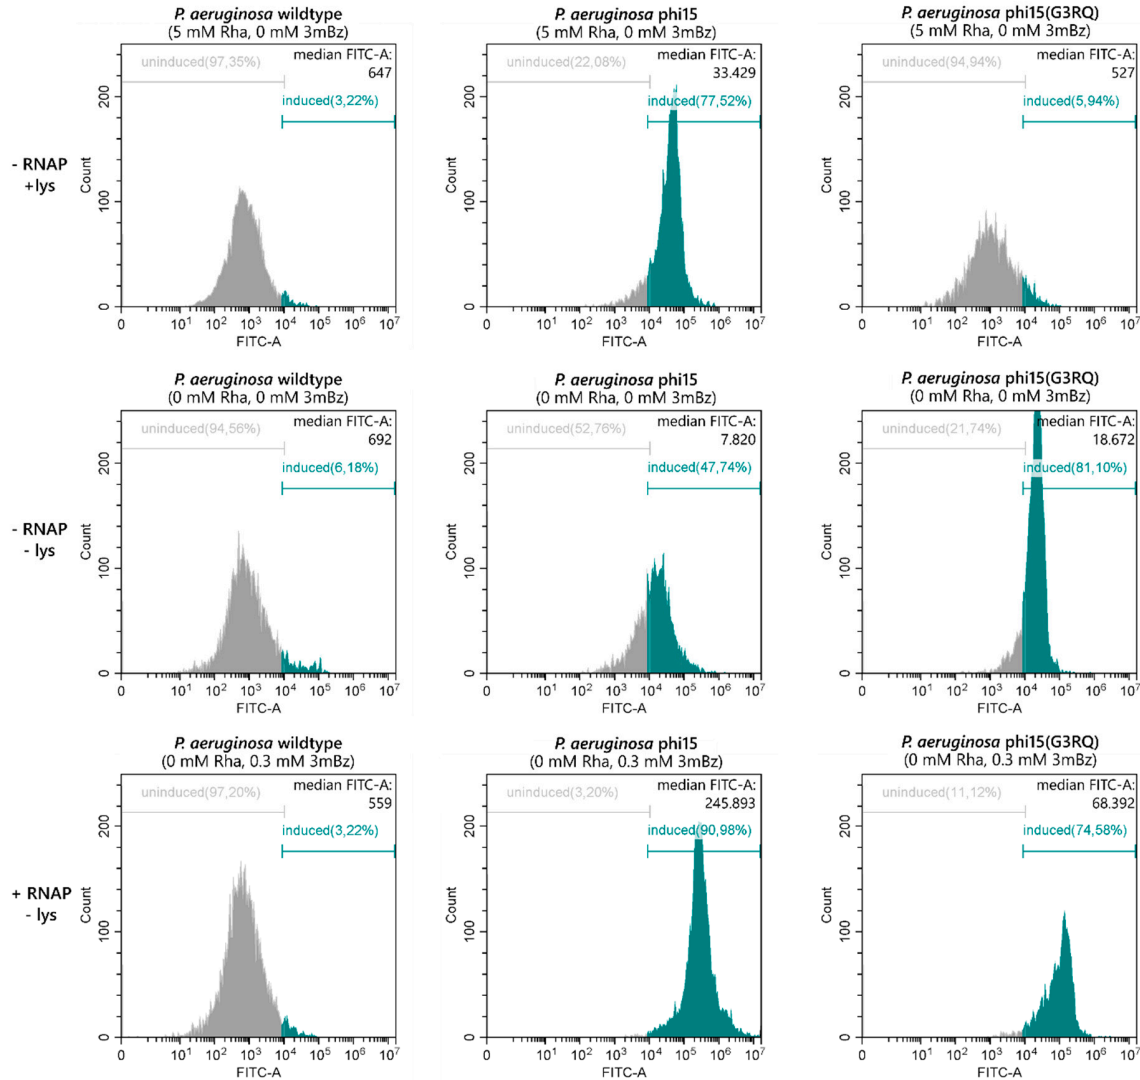

**Figure S8.** Flow cytometry data of strains *P. aeruginosa* PAO1 (wildtype), *P. aeruginosa* PAO1 with the phi15 RNAP, phi15 reporter construct and phi15 lysozyme (phi15) and *P. aeruginosa* PAO1 with the phi15 RNAP, phi15 reporter construct and phi15 lysozyme (G3RQ) mutant (phi15(G3RQ)). Strains were induced overnight with 5 mM Rha (+lys) or 0.3 mM 3mBz (+RNAP), after which 5,000 cells were analyzed with flow cytometry for FITC-A as described in the method section. Cells with a FITC-A level above  $10^4$  are considered induced (green), whereas cells below  $10^4$  are uninduced. The median FITC-A depicts the median FITC-A value of the entire cell population.

## Supplementary Tables

Table S1. Table of primers. Colors of color-coded primers indicate the following. Blue: *SapI* recognition site; green: *SapI* restriction site; yellow: *BsaI* recognition site; grey: *BsaI* restriction site; red: sequence for amplification of the target region.

| Name                   | Sequence (5'→3')                                        | Use                                                                       |
|------------------------|---------------------------------------------------------|---------------------------------------------------------------------------|
| SEVA_PS1               | AGGGCGGCGGATTTGTCC                                      | Colony PCR and Sanger sequencing of pSTEntry                              |
| SEVA_PS2               | GCGGCAACCGAGCGTTC                                       | Colony PCR and Sanger sequencing of pSTEntry, pBGDes, pSTDesX and pSTDesR |
| InsertDes1_F           | AATCTGGCTCCCCAACTAATGC                                  | Colony PCR and Sanger sequencing of pSTDesX                               |
| InsertDes2_F           | GCGTTCGGTCAAGGTTCTGGAC                                  | Colony PCR and Sanger sequencing of pBGDes                                |
| InsertDes4_F           | CGGCGAAATAGTAATCACGAGGTCAG                              | Colony PCR and Sanger sequencing of pSTDesR                               |
| ST_phi15RNAP_F         | CATGACCATGAGGAGGAAAAACAAATGATTGAAGTAGCAAAGAACG          | Gibson Assembly of                                                        |
| ST_phi15RNAP_R         | CTATCAACAGGAGTCCAAGACTAGTTGTTAGCGAAAGCGAATTGAGAC        | pSTDesXa/b-phi15RNAP                                                      |
| ST_Pf10RNAP_F          | CATGACCATGAGGAGGAAAAACAAATGGCTGTAATCGAAAAGAAAC          | Gibson Assembly of                                                        |
| ST_Pf10RNAP_R          | CTATCAACAGGAGTCCAAGACTAGTTGTTAAGCGAATGCAAACTCGGAC       | pSTDesXa/b-Pf-10RNAP                                                      |
| ST_PPPL1RNAP_F         | CATGACCATGAGGAGGAAAAACAAATGATCCATGAAACTCCGCG            | Gibson Assembly of                                                        |
| ST_PPPL1RNAP_R         | CTATCAACAGGAGTCCAAGACTAGTTGTTATGCGAAAGCGAAGTCAGATTG     | pSTDesXa/b-PPPL-1RNAP                                                     |
| ST_67PfluR64PPRNA_P_F  | CATGACCATGAGGAGGAAAAACAAATGGCTATCATCGCACCAG             | Gibson Assembly of                                                        |
| ST_67PfluR64PPPflu_R   | CTATCAACAGGAGTCCAAGACTAGTTGTTATGCAAAATGCGAATTCAGACTTCAG | pSTDesXa/b-67PfluR64PP RNAP                                               |
| ST_msfGFP_F            | GACGCTCTTCCAGAGGTCTCGAATGATCATGGGAATTCATAAAGGTG         | Creation of msfGFP                                                        |
| ST_msfGFPend_R         | TAGGCTCTTCTCTGGTCTCATCTATTGTAGAGTTCATCCATGCCG           | SEVAtile                                                                  |
| pBG_BsaI_F             | GACGGTCTCTAAGAGAAATCGAGCTCGGTAC                         | Vector amplification of                                                   |
| pBG_BsaI_R             | GTCGGTCTCCTAGATTAATTAAGACGTCTTGAC                       | pBG13 for SEVAtile shuffling                                              |
| promRBS_T7_F           | GACGCTCTTCCAGAGGTCTCGTCTATAATACGACTCACTATAGG            | Creation of P <sub>T7,MCP</sub>                                           |
| promRBS_T7_R           | TAGGCTCTTCTCTGGTCTCACATTTGTATATCTCCTTC                  | SEVAtile                                                                  |
| promRBS_Phi15_F        | GACGCTCTTCCAGAGGTCTCGTCTATAAAAACCCACACAATAG             | Creation of P <sub>phi15,MCP</sub>                                        |
| promRBS_Phi15_R        | TAGGCTCTTCTCTGGTCTCACATTTGTAGTTCTCCTTGAG                | SEVAtile                                                                  |
| promRBS_PPPL_F         | GACGCTCTTCCAGAGGTCTCGTCTATAAAAACCCCTCACTATTG            | Creation of P <sub>PPPL-1,MCP</sub>                                       |
| promRBS_PPPL_R         | TAGGCTCTTCTCTGGTCTCACATTTGTAGTTCTCCTTCTTTG              | SEVAtile                                                                  |
| promRBS_Pf-10_F        | GACGCTCTTCCAGAGGTCTCGTCTATTAAAAACCCCTCACCTAAAC          | Creation of P <sub>Pf-10,MCP</sub>                                        |
| promRBS_Pf-10_R        | TAGGCTCTTCTCTGGTCTCACATTTGTGGGACTCCTTATGTAATC           | SEVAtile                                                                  |
| promRBS_67PfluR64P_P_F | GACGCTCTTCCAGAGGTCTCGTCTATAAAAACCCCTCACCTATACAGG        | Creation of P <sub>67PfluR64PP,MCP</sub>                                  |
| promRBS_67PfluR64P_P_R | TAGGCTCTTCTCTGGTCTCACATTTAGTGGAACCTCCTTATGC             | SEVAtile                                                                  |
| promRBS_T7_F           | GACGCTCTTCCAGAGGTCTCGTCTATAATACGACTCACTATAGG            | Creation of P <sub>T7,GG</sub>                                            |
| promRBS_T7_R           | TAGGCTCTTCTCTGGTCTCACATTTGTATATCTCCTTC                  | SEVAtile                                                                  |
| ST_phi15_promb_F       | AGAGGTCTCTTCTATAAAAACCCACACAATAGGGCAGTGAGACC            | Creation of P <sub>phi15,GG</sub>                                         |
| ST_phi15_promb_R       | CTTGGTCTCACTGCCCTATTGTGTGGGTTTTATAGAAGAGACC             | SEVAtile                                                                  |
| ST_PPPL1_promb_F       | AGAGGTCTCTTCTATAAAAACCCCTCACTATTGGGCAGAGAGACC           | Creation of P <sub>PPPL-1,GG</sub>                                        |
| ST_PPPL1_promb_R       | CTTGGTCTCTTGCCCAATAGTGAGGGGTTTTATAGAAGAGACC             | SEVAtile                                                                  |
| ST_Pf10_promb_F        | AGAGGTCTCTTCTATTAAAAACCCCTCACCTAAGGGCAGAGAGACC          | Creation of P <sub>Pf-10,GG</sub>                                         |
| ST_Pf10_promb_R        | CTTGGTCTCTTGCCCTTAGGTGAGGGTTTTAATAGAAGAGACC             | SEVAtile                                                                  |
| ST_67PfluR64PP_promb_F | AGAGGTCTCTTCTATAAAAACCCCTCACCTATGGGCAGTGAGACC           | Creation of P <sub>67PfluR64PP,GG</sub>                                   |
| ST_67PfluR64PP_promb_R | CTTGGTCTCACTGCCCATAGGTGAGGGTTTTATAGAAGAGACC             | SEVAtile                                                                  |
| ST_phi15_promc_F       | AGAGGTCTCTTCTATAAAAACCCACACAATAGAGCAGTGAGACC            | Creation of P <sub>phi15,GA</sub>                                         |
| ST_phi15_promc_R       | CTTGGTCTCACTGCTCTATTGTGTGGGTTTTATAGAAGAGACC             | SEVAtile                                                                  |
| ST_PPPL1_promc_F       | AGAGGTCTCTTCTATAAAAACCCCTCACTATTGCGCAGAGAGACC           |                                                                           |

| Name                   | Sequence (5'→3')                                             | Use                                                                  |
|------------------------|--------------------------------------------------------------|----------------------------------------------------------------------|
| ST_PPPL1_promc_R       | CTTGGTCTCTCTGCGCAATAGTGAGGGGTTTTATAGAAGAGACC                 | Creation of P <sup>PPPL-1,GC</sup> SEVAtile                          |
| ST_Pf10_promc_F        | AGAGGTCTCTTCTATTAATAAACCCCTCACCTAAACGCAGAGAGACC              | Creation of P <sup>Pf-10,AC</sup> SEVAtile                           |
| ST_Pf10_promc_R        | CTTGGTCTCTCTGCGTTTAGGTGAGGGTTTTTAATAGAAGAGACC                |                                                                      |
| ST_67PfluR64PP_promc_F | AGAGGTCTCTTCTATAATAAACCCCTCACCTATACGCAGTGAGACC               | Creation of P <sup>67PfluR64PP,AC</sup> SEVAtile                     |
| ST_67PfluR64PP_promc_R | CTTGGTCTCACTGCGTATAGGTGAGGGTTTTATAGAAGAGACC                  |                                                                      |
| ST_T7_promD_F          | AGAGGTCTCTTCTATAATACGACTCACTATAGGGAGACCACAACGCAGAGAGACC      | Creation of P <sup>T7,MCP(nt1-13)</sup> SEVAtile                     |
| ST_T7_promD_R          | CTTGGTCTCTCTGCGTTGTGGTCTCCCTATAGTGAGTCGTATTATAGAAGAGACC      |                                                                      |
| ST_phi15_promD_F       | AGAGGTCTCTTCTATAATAAACCCACACAATAGACAGAGGGAGCCGCA GTGAGACC    | Creation of P <sup>phi15, MCP(nt1-13)</sup> SEVAtile                 |
| ST_phi15_promD_R       | CTTGGTCTCACTGCGGCTCCCTCTGTCTATTGTGTGGGTTTTATAGAAGAGACC       |                                                                      |
| ST_PPPL1_promD_F       | AGAGGTCTCTTCTATAATAAACCCCTCACTATTGCGACACACACGGGCAGAGAGACC    | Creation of P <sup>PPPL-1, MCP(nt1-13)</sup> SEVAtile                |
| ST_PPPL1_promD_R       | CTTGGTCTCTCTGCCCCGTGTGTGTCGCAATAGTGAGGGGTTTTATAGAA GAGACC    |                                                                      |
| ST_Pf10_promD_F        | AGAGGTCTCTTCTATTAATAAACCCCTCACCTAAACAGGGAGGACCAGCAGAGAGACC   | Creation of P <sup>Pf-10, MCP(nt1-13)</sup> SEVAtile                 |
| ST_Pf10_promD_R        | CTTGGTCTCTCTGCTGGTCTCCCTGTTTAGGTGAGGGTTTTTAATAGAA GAGACC     |                                                                      |
| ST_67PfluR64PP_promD_F | AGAGGTCTCTTCTATAATAAACCCCTCACCTATACAGGAGGGAGCCGCAGTGAGACC    | Creation of P <sup>67PfluR64PP, MCP(nt1-13)</sup> SEVAtile           |
| ST_67PfluR64PP_promD_R | CTTGGTCTCACTGCGGCTCCCTCTGTATAGGTGAGGGTTTTATAGAA GAGACC       |                                                                      |
| ST_BCD2_F              | GCGGCTCTTCCAGAGGTCTCTGCAGGCCCAAGTTCACTTAAAAAGG               | Creation of BCD2 SEVAtile                                            |
| ST_BCD2_R3             | GCCGCTCTTCTCTTGGTCTCGCATTAGAAAACCTCCTTAGCATG                 |                                                                      |
| ST_T7lys_F             | GACGCTCTTCCAGAGGTCTCGAATGGCTCGTGTACAGTTTAAAC                 | Creation of T7 lysozyme SEVAtile                                     |
| ST_T7lys_R             | TAGGCTCTTCTCTTGGTCTCAGTTATCCACGGTCAGAAGTGACC                 |                                                                      |
| ST_phi15lys_F          | GACGCTCTTCCAGAGGTCTCGAATGGCTGGAGTCAAATTTAAGG                 | Creation of phi15 lysozyme SEVAtile                                  |
| ST_phi15lys_R          | TAGGCTCTTCTCTTGGTCTCAGTTAATTGATCTGAGCGGCCC                   |                                                                      |
| ST_PPPL-1lys_F         | GACTGGTCGTAATGAAATTCAGGAGGTGGTCGACAATGCCAAGGTTCAATTCAAG      | Gibson Assembly of pSTDesR-PPPL-1lys                                 |
| ST_PPPL-1lys_R         | CAACAGGAGTCCAAGACTAGGTTACAGGCCGACTGATTGGAGCC                 |                                                                      |
| ST_Pf-10lys_F          | GACTGGTCGTAATGAAATTCAGGAGGTGGTCGACAATGGCCCGTCAAG TTCAGTTC    | Gibson Assembly of pSTDesR-Pf-10lys                                  |
| ST_Pf-10lys_R          | CAACAGGAGTCCAAGACTAGGTTACTCGGTGACAGACTTCC                    |                                                                      |
| ST_67PfluR64PPlys_F    | GACGCTCTTCCAGAGGTCTCGAATGGCGTCCAAAGTGCAGTTC                  | Creation of 67PfluR64PP lysozyme SEVAtile                            |
| ST_67PfluR64PPlys_R    | TAGGCTCTTCTCTTGGTCTCAGTTAATCCTTGCGGGCACTCC                   |                                                                      |
| phi15lysAA1-10_F       | AGAGGTCTCGAATGGCCCGTCAAGTTCAGTTCAACAAGCGTTTGAGTACCAAGATGATCG |                                                                      |
| phi15lysG3R_F          | TAAGCTCTTCTAGAGGTCTCGAATGGCTCGTGTCAAATTTAAGGAGCGC            | Creation of SEVAtiles of phi15 lysozyme mutants, with reverse primer |
| phi15lysG3Q_F          | TAAGCTCTTCTAGAGGTCTCGAATGGCTCAAGTCAAATTTAAGGAGCGC            | SNF_ST_phi15lysR                                                     |
| phi15lysG3RQ_F         | AGAGGTCTCGAATGGCTCGTCAAGTCAAATTTAAGGAGCGC                    |                                                                      |
| phi15lysK5Q_F          | AGAGGTCTCGAATGGCTGGAGTCCAATTTAAGGAGCGC                       |                                                                      |
| phi15lysKE78NK_F       | AGAGGTCTCGAATGGCTGGAGTCAAATTTAACAAGCGTTGAGTACCAAG            |                                                                      |

Table S1: Table of vectors

| Name                                                          | Relevant features                                                                                                                                                                | Reference                      |
|---------------------------------------------------------------|----------------------------------------------------------------------------------------------------------------------------------------------------------------------------------|--------------------------------|
| pSTDesXa                                                      | Destination vector; <i>oriT</i> ; <i>oriV</i> (pRO1600/ <i>ColE1</i> ); <i>xylS</i> / <i>Pm</i> → PT3- <i>SacB</i> -PT4; Km <sup>R</sup>                                         | (Lammens <i>et al.</i> , 2021) |
| pSTDesXa-empty                                                | pSTDesXa in which the <i>SacB</i> cassette is substituted with PT3- <i>linker</i> -PT4                                                                                           | This work                      |
| pSTDesXa-T7RNAP                                               | pSTDesXa in which the <i>SacB</i> cassette is substituted with PT3- <i>T7rnep</i> -PT4                                                                                           | (Lammens <i>et al.</i> , 2021) |
| pSTDesXa- <i>phi15</i> RNAP                                   | pSTDesXa in which the <i>SacB</i> cassette is substituted with PT3- <i>phi15rnep</i> -PT4                                                                                        | This work                      |
| pSTDesXa-Pf-10RNAP                                            | pSTDesXa in which the <i>SacB</i> cassette is substituted with PT3- <i>Pf-10rnep</i> -PT4                                                                                        | This work                      |
| pSTDesXa-PPPL-1RNAP                                           | pSTDesXa in which the <i>SacB</i> cassette is substituted with PT3- <i>PPPL-1rnep</i> -PT4                                                                                       | This work                      |
| pSTDesXa-67PfluR64PPRNAP                                      | pSTDesXa in which the <i>SacB</i> cassette is substituted with PT3-67PfluR64PPrnep-PT4                                                                                           | This work                      |
| pSTDesXb                                                      | Destination vector; <i>oriT</i> ; <i>oriV</i> (pRO1600/ <i>ColE1</i> ); <i>xylS</i> / <i>Pm</i> → PT3- <i>SacB</i> -PT4; Tc <sup>R</sup>                                         | (Lammens <i>et al.</i> , 2021) |
| pSTDesXb-empty                                                | pSTDesXb in which the <i>SacB</i> cassette is substituted with PT3- <i>linker</i> -PT4                                                                                           | This work                      |
| pSTDesXb-T7RNAP                                               | pSTDesXb in which the <i>SacB</i> cassette is substituted with PT3- <i>T7rnep</i> -PT4                                                                                           | (Lammens <i>et al.</i> , 2021) |
| pSTDesXb- <i>phi15</i> RNAP                                   | pSTDesXb in which the <i>SacB</i> cassette is substituted with PT3- <i>phi15rnep</i> -PT4                                                                                        | This work                      |
| pSTDesXb-Pf-10RNAP                                            | pSTDesXb in which the <i>SacB</i> cassette is substituted with PT3- <i>Pf-10rnep</i> -PT4                                                                                        | This work                      |
| pSTDesXb-PPPL-1RNAP                                           | pSTDesXb in which the <i>SacB</i> cassette is substituted with PT3- <i>PPPL-1rnep</i> -PT4                                                                                       | This work                      |
| pSTDesXb-67PfluR64PPRNAP                                      | pSTDesXb in which the <i>SacB</i> cassette is substituted with PT3-67PfluR64PPrnep-PT4                                                                                           | This work                      |
| pBG13                                                         | Destination vector; <i>oriT</i> ; <i>oriV</i> (R6K); <i>P<sub>EM7</sub></i> - <i>BCD2-msfGFP fusion</i> ; <i>Tn7L</i> and <i>Tn7R</i> extremes; Km <sup>R</sup> /Gm <sup>R</sup> | (Zobel <i>et al.</i> , 2015)   |
| pBGDes- <i>BCD2</i> - <i>msfGFP</i>                           | pBG13 derivative with PT1- <i>BCD2</i> -PT3- <i>msfGFP</i> -PT4 fusion                                                                                                           | (Lammens <i>et al.</i> , 2021) |
| pBGDes- <i>P<sub>T7,MCP</sub></i> - <i>msfGFP</i>             | pBG13 derivative with PT1- <i>P<sub>T7,MCP</sub></i> -PT3- <i>msfGFP</i> -PT4 fusion                                                                                             | (Lammens <i>et al.</i> , 2021) |
| pBGDes- <i>P<sub>phi15,MCP</sub></i> - <i>msfGFP</i>          | pBG13 derivative with PT1- <i>P<sub>phi15,MCP</sub></i> -PT3- <i>msfGFP</i> -PT4 fusion                                                                                          | This work                      |
| pBGDes- <i>P<sub>PPPL-1,MCP</sub></i> - <i>msfGFP</i>         | pBG13 derivative with PT1- <i>P<sub>PPPL-1,MCP</sub></i> -PT3- <i>msfGFP</i> -PT4 fusion                                                                                         | This work                      |
| pBGDes- <i>P<sub>Pf-10,MCP</sub></i> - <i>msfGFP</i>          | pBG13 derivative with PT1- <i>P<sub>Pf-10,MCP</sub></i> -PT3- <i>msfGFP</i> -PT4 fusion                                                                                          | This work                      |
| pBGDes- <i>P<sub>67PfluR64PP,MCP</sub></i> - <i>msfGFP</i>    | pBG13 derivative with PT1- <i>P<sub>67PfluR64PP,MCP</sub></i> -PT3- <i>msfGFP</i> -PT4 fusion                                                                                    | This work                      |
| pBGDes- <i>P<sub>T7,GG</sub></i> - <i>msfGFP</i>              | pBG13 derivative with PT1- <i>P<sub>T7,GG</sub></i> -PT2- <i>BCD2</i> -PT3- <i>msfGFP</i> -PT4 fusion                                                                            | This work                      |
| pBGDes- <i>P<sub>phi15,GG</sub></i> - <i>msfGFP</i>           | pBG13 derivative with PT1- <i>P<sub>phi15,GG</sub></i> -PT2- <i>BCD2</i> -PT3- <i>msfGFP</i> -PT4 fusion                                                                         | This work                      |
| pBGDes- <i>P<sub>PPPL-1,GG</sub></i> - <i>msfGFP</i>          | pBG13 derivative with PT1- <i>P<sub>PPPL-1,GG</sub></i> -PT2- <i>BCD2</i> -PT3- <i>msfGFP</i> -PT4 fusion                                                                        | This work                      |
| pBGDes- <i>P<sub>Pf-10,GG</sub></i> - <i>msfGFP</i>           | pBG13 derivative with PT1- <i>P<sub>Pf-10,GG</sub></i> -PT2- <i>BCD2</i> -PT3- <i>msfGFP</i> -PT4 fusion                                                                         | This work                      |
| pBGDes- <i>P<sub>67PfluR64PP,GG</sub></i> - <i>msfGFP</i>     | pBG13 derivative with PT1- <i>P<sub>67PfluR64PP,GG</sub></i> -PT2- <i>BCD2</i> -PT3- <i>msfGFP</i> -PT4 fusion                                                                   | This work                      |
| pBGDes- <i>P<sub>phi15,GA</sub></i> - <i>msfGFP</i>           | pBG13 derivative with PT1- <i>P<sub>phi15,GA</sub></i> -PT2- <i>BCD2</i> -PT3- <i>msfGFP</i> -PT4 fusion                                                                         | This work                      |
| pBGDes- <i>P<sub>PPPL-1,GC</sub></i> - <i>msfGFP</i>          | pBG13 derivative with PT1- <i>P<sub>PPPL-1,GC</sub></i> -PT2- <i>BCD2</i> -PT3- <i>msfGFP</i> -PT4 fusion                                                                        | This work                      |
| pBGDes- <i>P<sub>Pf-10,AC</sub></i> - <i>msfGFP</i>           | pBG13 derivative with PT1- <i>P<sub>Pf-10,AC</sub></i> -PT2- <i>BCD2</i> -PT3- <i>msfGFP</i> -PT4 fusion                                                                         | This work                      |
| pBGDes- <i>P<sub>67PfluR64PP,AC</sub></i> - <i>msfGFP</i>     | pBG13 derivative with PT1- <i>P<sub>67PfluR64PP,AC</sub></i> -PT2- <i>BCD2</i> -PT3- <i>msfGFP</i> -PT4 fusion                                                                   | This work                      |
| pBGDes- <i>P<sub>T7,MCP(NT1-13)</sub></i> - <i>msfGFP</i>     | pBG13 derivative with PT1- <i>P<sub>T7,MCP(nt1-13)</sub></i> -PT2- <i>BCD2</i> -PT3- <i>msfGFP</i> -PT4 fusion                                                                   | This work                      |
| pBGDes- <i>P<sub>phi15,MCP(NT1-13)</sub></i> - <i>msfGFP</i>  | pBG13 derivative with PT1- <i>P<sub>phi15,MCP(nt1-13)</sub></i> -PT2- <i>BCD2</i> -PT3- <i>msfGFP</i> -PT4 fusion                                                                | This work                      |
| pBGDes- <i>P<sub>PPPL-1,MCP(NT1-13)</sub></i> - <i>msfGFP</i> | pBG13 derivative with PT1- <i>P<sub>PPPL-1,MCP(nt1-13)</sub></i> -PT2- <i>BCD2</i> -PT3- <i>msfGFP</i> -PT4 fusion                                                               | This work                      |
| pBGDes- <i>P<sub>Pf-10,MCP(NT1-13)</sub></i> - <i>msfGFP</i>  | pBG13 derivative with PT1- <i>P<sub>Pf-10,MCP(nt1-13)</sub></i> -PT2- <i>BCD2</i> -PT3- <i>msfGFP</i> -PT4 fusion                                                                | This work                      |

|                                                             |                                                                                                                  |                                |
|-------------------------------------------------------------|------------------------------------------------------------------------------------------------------------------|--------------------------------|
| pBGDes- <i>P</i> <sub>67PfluR64PP,MCP(NT1-13)</sub> -msfGFP | pBG13 derivative with PT1- <i>P</i> <sub>67PfluR64PP,MCP(NT1-13)</sub> -PT2-BCD2-PT3- <i>msfGFP</i> -PT4 fusion  | This work                      |
| pSTDdesR                                                    | Destination vector; <i>oriT</i> ; <i>oriV(RK2)</i> ; <i>RhaRS/pRhaBAD</i> →MCS; Sm <sup>R</sup> /Sp <sup>R</sup> | (Lammens <i>et al.</i> , 2021) |
| pSTDdesR- <i>msfGFP</i>                                     | pSTDdesR in which the MCS is substituted with PT3- <i>msfGFP</i> -PT4                                            | (Lammens <i>et al.</i> , 2021) |
| pSTDdesR- <i>T7lys</i>                                      | pSTDdesR in which the MCS is substituted with PT3- <i>T7lysozyme</i> -PT4                                        | (Lammens <i>et al.</i> , 2021) |
| pSTDdesR- <i>phi15lys</i>                                   | pSTDdesR in which the MCS is substituted with PT3- <i>phi15lysozyme</i> -PT4                                     | This work                      |
| pSTDdesR-PPPL-1lys                                          | pSTDdesR in which the MCS is substituted with PT3-PPPL-1lysozyme-PT4                                             | This work                      |
| pSTDdesR-Pf-10lys                                           | pSTDdesR in which the MCS is substituted with PT3-Pf-10lysozyme-PT4                                              | This work                      |
| pSTDdesR-67PfluR64PPlys                                     | pSTDdesR in which the MCS is substituted with PT3-67PfluR64PPlysozyme-PT4                                        | This work                      |
| pSTDdesR- <i>phi15lys</i> (AA1-9>Pf-10(AA1-10))             | pSTDdesR in which the MCS is substituted with PT3- <i>phi15lysozyme</i> (AA1-9>Pf-10(AA1-10))-PT4                | This work                      |
| pSTDdesR- <i>phi15lys</i> (G3R)                             | pSTDdesR in which the MCS is substituted with PT3- <i>phi15lysozyme</i> (G3R)-PT4                                | This work                      |
| pSTDdesR- <i>phi15lys</i> (G3Q)                             | pSTDdesR in which the MCS is substituted with PT3- <i>phi15lysozyme</i> (G3Q)-PT4                                | This work                      |
| pSTDdesR- <i>phi15lys</i> (G3RQ)                            | pSTDdesR in which the MCS is substituted with PT3- <i>phi15lysozyme</i> (G3RQ)-PT4                               | This work                      |
| pSTDdesR- <i>phi15lys</i> (K5Q)                             | pSTDdesR in which the MCS is substituted with PT3- <i>phi15lysozyme</i> (K5Q)-PT4                                | This work                      |
| pSTDdesR- <i>phi15lys</i> (K7N,E8K)                         | pSTDdesR in which the MCS is substituted with PT3- <i>phi15lysozyme</i> (K7N,E8K)-PT4                            | This work                      |
| pTNS2                                                       | Helper plasmid; <i>oriV(R6K)</i> ; <i>tnsABCD</i> ; Amp <sup>R</sup>                                             | (Choi <i>et al.</i> , 2005)    |

Table S2: Bacterial strains used in this work. <sup>1</sup>Transformant strains were given a code, depending on the introduced vectors and inserts: p: reporter construct on pBGDes, R: RNAP on pSTDdesX, L: lysozyme on pSTDdesR. Letters A, B, C, D and E refer to phages T7, phi15, PPPL-1, Pf-10 and 67PfluR64PP, respectively. X refers to empty control vectors. Indices indicate the variant number.

| Name <sup>1</sup>       | Description                                                                                                                                                                                                                                                                       |
|-------------------------|-----------------------------------------------------------------------------------------------------------------------------------------------------------------------------------------------------------------------------------------------------------------------------------|
| <i>E. coli</i> TOP10    | Intermediate host for vector cloning (Invitrogen <sup>TM</sup> ); F- <i>mcrA</i> Δ( <i>mrr-hsdRMS-mcrBC</i> ) Φ80 <i>lacZ</i> Δ <i>M15</i> Δ <i>lacX74</i> <i>recA1</i> <i>araD139</i> Δ( <i>araleu</i> )7697 <i>galU</i> <i>galK</i> <i>rpsL</i> (StrR) <i>endA1</i> <i>nupG</i> |
| <i>E. coli</i> PIR2     | Intermediate host for cloning of vectors with R6K origin (Invitrogen <sup>TM</sup> ); F- Δ <i>lac169</i> <i>rpoS</i> (am) <i>robA1</i> <i>creC510</i> <i>hsdR514</i> <i>endA</i> <i>recA1</i> <i>uidA</i> (Δ <i>MluI</i> ): <i>pir</i>                                            |
| <i>P. putida</i> KT2440 | Derivative of <i>P. putida</i> mt-2 lacking the TOL plasmid (Bagdasarian <i>et al.</i> , 1981)                                                                                                                                                                                    |
| <i>P. putida</i> RX     | Km <sup>R</sup> , <i>P. putida</i> KT2440 with pSTDdesXa-empty                                                                                                                                                                                                                    |
| <i>P. putida</i> RA0    | Km <sup>R</sup> , <i>P. putida</i> KT2440 with pSTDdesXa-T7RNAP                                                                                                                                                                                                                   |
| <i>P. putida</i> RB0    | Km <sup>R</sup> , <i>P. putida</i> KT2440 with pSTDdesXa-phi15RNAP                                                                                                                                                                                                                |
| <i>P. putida</i> RC0    | Km <sup>R</sup> , <i>P. putida</i> KT2440 with pSTDdesXa-PPPL-1RNAP                                                                                                                                                                                                               |
| <i>P. putida</i> RD0    | Km <sup>R</sup> , <i>P. putida</i> KT2440 with pSTDdesXa-Pf-10RNAP                                                                                                                                                                                                                |
| <i>P. putida</i> RE0    | Km <sup>R</sup> , <i>P. putida</i> KT2440 with pSTDdesXa-67PfluR64PPRNAP                                                                                                                                                                                                          |
| <i>P. putida</i> pX     | Gm <sup>R</sup> , <i>P. putida</i> KT2440 with genomic insertion of pBGDes-BCD2- <i>msfGFP</i>                                                                                                                                                                                    |
| <i>P. putida</i> pA0    | Gm <sup>R</sup> , <i>P. putida</i> KT2440 with genomic insertion of pBGDes- <i>P</i> <sub>T7,MCP</sub> - <i>msfGFP</i>                                                                                                                                                            |



| Name <sup>1</sup>       | Description                                                                                                                                                      |
|-------------------------|------------------------------------------------------------------------------------------------------------------------------------------------------------------|
| <i>P. putida</i> pB0    | Gm <sup>R</sup> , <i>P. putida</i> KT2440 with genomic insertion of pBGDes- <i>P<sub>phi15,MCP</sub></i> -msfGFP                                                 |
| <i>P. putida</i> pC0    | Gm <sup>R</sup> , <i>P. putida</i> KT2440 with genomic insertion of pBGDes- <i>P<sub>PPPL-1,MCP</sub></i> -msfGFP                                                |
| <i>P. putida</i> pD0    | Gm <sup>R</sup> , <i>P. putida</i> KT2440 with genomic insertion of pBGDes- <i>P<sub>Pf-10</sub></i> -msfGFP                                                     |
| <i>P. putida</i> pE0    | Gm <sup>R</sup> , <i>P. putida</i> KT2440 with genomic insertion of pBGDes- <i>P<sub>67PfluR64PP</sub></i> -msfGFP                                               |
| <i>P. putida</i> pXRX   | Gm <sup>R</sup> , Km <sup>R</sup> , <i>P. putida</i> KT2440 with genomic insertion of pBGDes- <i>BCD2</i> -msfGFP and pSTDesXa-empty                             |
| <i>P. putida</i> pA0RA0 | Gm <sup>R</sup> , Km <sup>R</sup> , <i>P. putida</i> KT2440 with genomic insertion of pBGDes- <i>P<sub>T7,MCP</sub></i> -msfGFP and pSTDesXa-T7RNAP              |
| <i>P. putida</i> pA0RB0 | Gm <sup>R</sup> , Km <sup>R</sup> , <i>P. putida</i> KT2440 with genomic insertion of pBGDes- <i>P<sub>T7,MCP</sub></i> -msfGFP and pSTDesXa-phi15RNAP           |
| <i>P. putida</i> pA0RC0 | Gm <sup>R</sup> , Km <sup>R</sup> , <i>P. putida</i> KT2440 with genomic insertion of pBGDes- <i>P<sub>T7,MCP</sub></i> -msfGFP and pSTDesXa-PPPL-1RNAP          |
| <i>P. putida</i> pA0RD0 | Gm <sup>R</sup> , Km <sup>R</sup> , <i>P. putida</i> KT2440 with genomic insertion of pBGDes- <i>P<sub>T7,MCP</sub></i> -msfGFP and pSTDesXa-Pf-10RNAP           |
| <i>P. putida</i> pA0RE0 | Gm <sup>R</sup> , Km <sup>R</sup> , <i>P. putida</i> KT2440 with genomic insertion of pBGDes- <i>P<sub>T7,MCP</sub></i> -msfGFP and pSTDesXa-67PfluR64PPRNAP     |
| <i>P. putida</i> pA0RA0 | Gm <sup>R</sup> , Km <sup>R</sup> , <i>P. putida</i> KT2440 with genomic insertion of pBGDes- <i>P<sub>T7,MCP</sub></i> -msfGFP and pSTDesXa-T7RNAP              |
| <i>P. putida</i> pB0RA0 | Gm <sup>R</sup> , Km <sup>R</sup> , <i>P. putida</i> KT2440 with genomic insertion of pBGDes- <i>P<sub>phi15,MCP</sub></i> -msfGFP and pSTDesXa-T7RNAP           |
| <i>P. putida</i> pB0RB0 | Gm <sup>R</sup> , Km <sup>R</sup> , <i>P. putida</i> KT2440 with genomic insertion of pBGDes- <i>P<sub>phi15,MCP</sub></i> -msfGFP and pSTDesXa-phi15RNAP        |
| <i>P. putida</i> pB0RC0 | Gm <sup>R</sup> , Km <sup>R</sup> , <i>P. putida</i> KT2440 with genomic insertion of pBGDes- <i>P<sub>phi15,MCP</sub></i> -msfGFP and pSTDesXa-PPPL-1RNAP       |
| <i>P. putida</i> pB0RD0 | Gm <sup>R</sup> , Km <sup>R</sup> , <i>P. putida</i> KT2440 with genomic insertion of pBGDes- <i>P<sub>phi15,MCP</sub></i> -msfGFP and pSTDesXa-Pf-10RNAP        |
| <i>P. putida</i> pB0RE0 | Gm <sup>R</sup> , Km <sup>R</sup> , <i>P. putida</i> KT2440 with genomic insertion of pBGDes- <i>P<sub>phi15,MCP</sub></i> -msfGFP and pSTDesXa-67PfluR64PPRNAP  |
| <i>P. putida</i> pC0RA0 | Gm <sup>R</sup> , Km <sup>R</sup> , <i>P. putida</i> KT2440 with genomic insertion of pBGDes- <i>P<sub>PPPL-1,MCP</sub></i> -msfGFP and pSTDesXa-T7RNAP          |
| <i>P. putida</i> pC0RB0 | Gm <sup>R</sup> , Km <sup>R</sup> , <i>P. putida</i> KT2440 with genomic insertion of pBGDes- <i>P<sub>PPPL-1,MCP</sub></i> -msfGFP and pSTDesXa-phi15RNAP       |
| <i>P. putida</i> pC0RC0 | Gm <sup>R</sup> , Km <sup>R</sup> , <i>P. putida</i> KT2440 with genomic insertion of pBGDes- <i>P<sub>PPPL-1,MCP</sub></i> -msfGFP and pSTDesXa-PPPL-1RNAP      |
| <i>P. putida</i> pC0RD0 | Gm <sup>R</sup> , Km <sup>R</sup> , <i>P. putida</i> KT2440 with genomic insertion of pBGDes- <i>P<sub>PPPL-1,MCP</sub></i> -msfGFP and pSTDesXa-Pf-10RNAP       |
| <i>P. putida</i> pC0RE0 | Gm <sup>R</sup> , Km <sup>R</sup> , <i>P. putida</i> KT2440 with genomic insertion of pBGDes- <i>P<sub>PPPL-1,MCP</sub></i> -msfGFP and pSTDesXa-67PfluR64PPRNAP |
| <i>P. putida</i> pD0RA0 | Gm <sup>R</sup> , Km <sup>R</sup> , <i>P. putida</i> KT2440 with genomic insertion of pBGDes- <i>P<sub>Pf-10,MCP</sub></i> -msfGFP and pSTDesXa-T7RNAP           |
| <i>P. putida</i> pD0RB0 | Gm <sup>R</sup> , Km <sup>R</sup> , <i>P. putida</i> KT2440 with genomic insertion of pBGDes- <i>P<sub>Pf-10,MCP</sub></i> -msfGFP and pSTDesXa-phi15RNAP        |
| <i>P. putida</i> pD0RC0 | Gm <sup>R</sup> , Km <sup>R</sup> , <i>P. putida</i> KT2440 with genomic insertion of pBGDes- <i>P<sub>Pf-10,MCP</sub></i> -msfGFP and pSTDesXa-PPPL-1RNAP       |
| <i>P. putida</i> pD0RD0 | Gm <sup>R</sup> , Km <sup>R</sup> , <i>P. putida</i> KT2440 with genomic insertion of pBGDes- <i>P<sub>Pf-10,MCP</sub></i> -msfGFP and pSTDesXa-Pf-10RNAP        |
| <i>P. putida</i> pD0RE0 | Gm <sup>R</sup> , Km <sup>R</sup> , <i>P. putida</i> KT2440 with genomic insertion of pBGDes- <i>P<sub>Pf-10,MCP</sub></i> -msfGFP and pSTDesXa-67PfluR64PPRNAP  |
| <i>P. putida</i> pE0RA0 | Gm <sup>R</sup> , Km <sup>R</sup> , <i>P. putida</i> KT2440 with genomic insertion of pBGDes- <i>P<sub>67PfluR64PP,MCP</sub></i> -msfGFP and pSTDesXa-T7RNAP     |
| <i>P. putida</i> pE0RB0 | Gm <sup>R</sup> , Km <sup>R</sup> , <i>P. putida</i> KT2440 with genomic insertion of pBGDes- <i>P<sub>67PfluR64PP,MCP</sub></i> -msfGFP and pSTDesXa-phi15RNAP  |
| <i>P. putida</i> pE0RC0 | Gm <sup>R</sup> , Km <sup>R</sup> , <i>P. putida</i> KT2440 with genomic insertion of pBGDes- <i>P<sub>67PfluR64PP,MCP</sub></i> -msfGFP and pSTDesXa-PPPL-1RNAP |
| <i>P. putida</i> pE0RD0 | Gm <sup>R</sup> , Km <sup>R</sup> , <i>P. putida</i> KT2440 with genomic insertion of pBGDes- <i>P<sub>67PfluR64PP,MCP</sub></i> -msfGFP and pSTDesXa-Pf-10RNAP  |

| Name <sup>1</sup>          | Description                                                                                                                                                                                                      |
|----------------------------|------------------------------------------------------------------------------------------------------------------------------------------------------------------------------------------------------------------|
| <i>P. putida</i> pE0RE0    | Gm <sup>R</sup> , Km <sup>R</sup> , <i>P. putida</i> KT2440 with genomic insertion of pBGDes- <i>P</i> <sub>67PfluR64PP,MCP</sub> -msfGFP and pSTDesXa-67PfluR64PPRNAP                                           |
| <i>P. putida</i> pA1RA0    | Gm <sup>R</sup> , Km <sup>R</sup> , <i>P. putida</i> KT2440 with genomic insertion of pBGDes- <i>P</i> <sub>T7,GG</sub> -msfGFP and pSTDesXa-T7RNAP                                                              |
| <i>P. putida</i> pB1RB0    | Gm <sup>R</sup> , Km <sup>R</sup> , <i>P. putida</i> KT2440 with genomic insertion of pBGDes- <i>P</i> <sub>phi15,GG</sub> -msfGFP and pSTDesXa-phi15RNAP                                                        |
| <i>P. putida</i> pC1RC0    | Gm <sup>R</sup> , Km <sup>R</sup> , <i>P. putida</i> KT2440 with genomic insertion of pBGDes- <i>P</i> <sub>PPPL-1,GG</sub> -msfGFP and pSTDesXa-PPPL-1RNAP                                                      |
| <i>P. putida</i> pD1RD0    | Gm <sup>R</sup> , Km <sup>R</sup> , <i>P. putida</i> KT2440 with genomic insertion of pBGDes- <i>P</i> <sub>Pf-10,GG</sub> -msfGFP and pSTDesXa-Pf-10RNAP                                                        |
| <i>P. putida</i> pE1RE0    | Gm <sup>R</sup> , Km <sup>R</sup> , <i>P. putida</i> KT2440 with genomic insertion of pBGDes- <i>P</i> <sub>67PfluR64PP,GG</sub> -msfGFP and pSTDesXa-67PfluR64PPRNAP                                            |
| <i>P. putida</i> pB2RB0    | Gm <sup>R</sup> , Km <sup>R</sup> , <i>P. putida</i> KT2440 with genomic insertion of pBGDes- <i>P</i> <sub>phi15,GA</sub> -msfGFP and pSTDesXa-phi15RNAP                                                        |
| <i>P. putida</i> pC2RC0    | Gm <sup>R</sup> , Km <sup>R</sup> , <i>P. putida</i> KT2440 with genomic insertion of pBGDes- <i>P</i> <sub>PPPL-1,GC</sub> -msfGFP and pSTDesXa-PPPL-1RNAP                                                      |
| <i>P. putida</i> pD2RD0    | Gm <sup>R</sup> , Km <sup>R</sup> , <i>P. putida</i> KT2440 with genomic insertion of pBGDes- <i>P</i> <sub>Pf-10,AC</sub> -msfGFP and pSTDesXa-Pf-10RNAP                                                        |
| <i>P. putida</i> pE2RE0    | Gm <sup>R</sup> , Km <sup>R</sup> , <i>P. putida</i> KT2440 with genomic insertion of pBGDes- <i>P</i> <sub>67PfluR64PP,AC</sub> -msfGFP and pSTDesXa-67PfluR64PPRNAP                                            |
| <i>P. putida</i> pA3RA0    | Gm <sup>R</sup> , Km <sup>R</sup> , <i>P. putida</i> KT2440 with genomic insertion of pBGDes- <i>P</i> <sub>T7,MCP(nt1-13)</sub> -msfGFP and pSTDesXa-T7RNAP                                                     |
| <i>P. putida</i> pB3RB0    | Gm <sup>R</sup> , Km <sup>R</sup> , <i>P. putida</i> KT2440 with genomic insertion of pBGDes- <i>P</i> <sub>phi15,MCP(nt1-13)</sub> -msfGFP and pSTDesXa-phi15RNAP                                               |
| <i>P. putida</i> pC3RC0    | Gm <sup>R</sup> , Km <sup>R</sup> , <i>P. putida</i> KT2440 with genomic insertion of pBGDes- <i>P</i> <sub>PPPL-1,MCP(nt1-13)</sub> -msfGFP and pSTDesXa-PPPL-1RNAP                                             |
| <i>P. putida</i> pD3RD0    | Gm <sup>R</sup> , Km <sup>R</sup> , <i>P. putida</i> KT2440 with genomic insertion of pBGDes- <i>P</i> <sub>Pf-10,MCP(nt1-13)</sub> -msfGFP and pSTDesXa-Pf-10RNAP                                               |
| <i>P. putida</i> pE3RE0    | Gm <sup>R</sup> , Km <sup>R</sup> , <i>P. putida</i> KT2440 with genomic insertion of pBGDes- <i>P</i> <sub>67PfluR64PP,MCP(nt1-13)</sub> -msfGFP and pSTDesXa-67PfluR64PPRNAP                                   |
| <i>P. putida</i> pA0RA1    | Gm <sup>R</sup> , Km <sup>R</sup> , <i>P. putida</i> KT2440 with genomic insertion of pBGDes- <i>P</i> <sub>T7,MCP</sub> -msfGFP and pSTDesXa-T7RNAP(R632S)                                                      |
| <i>P. putida</i> pB0RB1    | Gm <sup>R</sup> , Km <sup>R</sup> , <i>P. putida</i> KT2440 with genomic insertion of pBGDes- <i>P</i> <sub>phi15,MCP</sub> -msfGFP and pSTDesXa-phi15RNAP(R630S)                                                |
| <i>P. putida</i> LX        | Sm <sup>R</sup> , <i>P. putida</i> KT2440 with pSTDesR-empty                                                                                                                                                     |
| <i>P. putida</i> LA0       | Sm <sup>R</sup> , <i>P. putida</i> KT2440 with pSTDesR-T7lys                                                                                                                                                     |
| <i>P. putida</i> LB0       | Sm <sup>R</sup> , <i>P. putida</i> KT2440 with pSTDesR-phi15lys                                                                                                                                                  |
| <i>P. putida</i> LC0       | Sm <sup>R</sup> , <i>P. putida</i> KT2440 with pSTDesR-PPPL-1lys                                                                                                                                                 |
| <i>P. putida</i> LD0       | Sm <sup>R</sup> , <i>P. putida</i> KT2440 with pSTDesR-Pf-10lys                                                                                                                                                  |
| <i>P. putida</i> LE0       | Sm <sup>R</sup> , <i>P. putida</i> KT2440 with pSTDesR-67PfluR64PPlys                                                                                                                                            |
| <i>P. putida</i> pXRXLX    | Gm <sup>R</sup> , Km <sup>R</sup> , Sm <sup>R</sup> , <i>P. putida</i> KT2440 with genomic insertion of pBGDes- <i>BCD2</i> -msfGFP, pSTDesXa-empty and pSTDesR-empty                                            |
| <i>P. putida</i> pA0RA0LA0 | Gm <sup>R</sup> , Km <sup>R</sup> , Sm <sup>R</sup> , <i>P. putida</i> KT2440 with genomic insertion of pBGDes- <i>P</i> <sub>T7,MCP</sub> -msfGFP, pSTDesXa-T7RNAP and pSTDesR-T7lys                            |
| <i>P. putida</i> pB0RB0LB0 | Gm <sup>R</sup> , Km <sup>R</sup> , Sm <sup>R</sup> , <i>P. putida</i> KT2440 with genomic insertion of pBGDes- <i>P</i> <sub>phi15,MCP</sub> -msfGFP, pSTDesXa-phi15RNAP and pSTDesR-phi15lys                   |
| <i>P. putida</i> pC0RC0LC0 | Gm <sup>R</sup> , Km <sup>R</sup> , Sm <sup>R</sup> , <i>P. putida</i> KT2440 with genomic insertion of pBGDes- <i>P</i> <sub>PPPL-1,MCP</sub> -msfGFP, pSTDesXa-PPPL-1RNAP and pSTDesR-PPPL-1lys                |
| <i>P. putida</i> pD0RD0LD0 | Gm <sup>R</sup> , Km <sup>R</sup> , Sm <sup>R</sup> , <i>P. putida</i> KT2440 with genomic insertion of pBGDes- <i>P</i> <sub>Pf-10,MCP</sub> -msfGFP, pSTDesXa-Pf-10RNAP and pSTDesR-Pf-10lys                   |
| <i>P. putida</i> pE0RE0LE0 | Gm <sup>R</sup> , Km <sup>R</sup> , Sm <sup>R</sup> , <i>P. putida</i> KT2440 with genomic insertion of pBGDes- <i>P</i> <sub>67PfluR64PP,MCP</sub> -msfGFP, pSTDesXa-67PfluR64PPRNAP and pSTDesR-67PfluR64PPlys |
| <i>P. putida</i> pB0RB0LA0 | Gm <sup>R</sup> , Km <sup>R</sup> , Sm <sup>R</sup> , <i>P. putida</i> KT2440 with genomic insertion of pBGDes- <i>P</i> <sub>phi15,MCP</sub> -msfGFP, pSTDesXa-phi15RNAP and pSTDesR-T7lys                      |

| Name <sup>1</sup>           | Description                                                                                                                                                                                                         |
|-----------------------------|---------------------------------------------------------------------------------------------------------------------------------------------------------------------------------------------------------------------|
| <i>P. putida</i> pB0RB0LC0  | Gm <sup>R</sup> , Km <sup>R</sup> , Sm <sup>R</sup> , <i>P. putida</i> KT2440 with genomic insertion of pBGDes- <i>P</i> <sub>phi15,MCP</sub> -msfGFP, pSTDesXa-phi15RNAP and pSTDesR-PPPL-1lys                     |
| <i>P. putida</i> pB0RB0LD0  | Gm <sup>R</sup> , Km <sup>R</sup> , Sm <sup>R</sup> , <i>P. putida</i> KT2440 with genomic insertion of pBGDes- <i>P</i> <sub>phi15,MCP</sub> -msfGFP, pSTDesXa-phi15RNAP and pSTDesR-Pf-10lys                      |
| <i>P. putida</i> pB0RB0LE0  | Gm <sup>R</sup> , Km <sup>R</sup> , Sm <sup>R</sup> , <i>P. putida</i> KT2440 with genomic insertion of pBGDes- <i>P</i> <sub>phi15,MCP</sub> -msfGFP, pSTDesXa-phi15RNAP and pSTDesR-67PfluR64PPlys                |
| <i>P. putida</i> pB0RB0LB1  | Gm <sup>R</sup> , Km <sup>R</sup> , Sm <sup>R</sup> , <i>P. putida</i> KT2440 with genomic insertion of pBGDes- <i>P</i> <sub>phi15,MCP</sub> -msfGFP, pSTDesXa-phi15RNAP and pSTDesR-phi15lys(AA1-9>Pf-10(AA1-10)) |
| <i>P. putida</i> pB0RB0LB2  | Gm <sup>R</sup> , Km <sup>R</sup> , Sm <sup>R</sup> , <i>P. putida</i> KT2440 with genomic insertion of pBGDes- <i>P</i> <sub>phi15,MCP</sub> -msfGFP, pSTDesXa-phi15RNAP and pSTDesR-phi15lys(G3R)                 |
| <i>P. putida</i> pB0RB0LB3  | Gm <sup>R</sup> , Km <sup>R</sup> , Sm <sup>R</sup> , <i>P. putida</i> KT2440 with genomic insertion of pBGDes- <i>P</i> <sub>phi15,MCP</sub> -msfGFP, pSTDesXa-phi15RNAP and pSTDesR-phi15lys(G3Q)                 |
| <i>P. putida</i> pB0RB0LB4  | Gm <sup>R</sup> , Km <sup>R</sup> , Sm <sup>R</sup> , <i>P. putida</i> KT2440 with genomic insertion of pBGDes- <i>P</i> <sub>phi15,MCP</sub> -msfGFP, pSTDesXa-phi15RNAP and pSTDesR-phi15lys(G3RQ)                |
| <i>P. putida</i> pB0RB0LB5  | Gm <sup>R</sup> , Km <sup>R</sup> , Sm <sup>R</sup> , <i>P. putida</i> KT2440 with genomic insertion of pBGDes- <i>P</i> <sub>phi15,MCP</sub> -msfGFP, pSTDesXa-phi15RNAP and pSTDesR-phi15lys(K5Q)                 |
| <i>P. putida</i> pB0RB0LB6  | Gm <sup>R</sup> , Km <sup>R</sup> , Sm <sup>R</sup> , <i>P. putida</i> KT2440 with genomic insertion of pBGDes- <i>P</i> <sub>phi15,MCP</sub> -msfGFP, pSTDesXa-phi15RNAP and pSTDesR-phi15lys(K7N,E8K)             |
| <i>P. aeruginosa</i> PAO1   | Chloramphenicol-resistant mutant of <i>P. aeruginosa</i> isolate PAO (Stover <i>et al.</i> , 2000)                                                                                                                  |
| <i>P. aeruginosa</i> RX     | Tc <sup>R</sup> , <i>P. aeruginosa</i> PA01 with pSTDesXb-empty                                                                                                                                                     |
| <i>P. aeruginosa</i> RA0    | Tc <sup>R</sup> , <i>P. aeruginosa</i> PA01 with pSTDesXb-T7RNAP                                                                                                                                                    |
| <i>P. aeruginosa</i> RB0    | Tc <sup>R</sup> , <i>P. aeruginosa</i> PA01 with pSTDesXb-phi15RNAP                                                                                                                                                 |
| <i>P. aeruginosa</i> RC0    | Tc <sup>R</sup> , <i>P. aeruginosa</i> PA01 with pSTDesXb-PPPL-1RNAP                                                                                                                                                |
| <i>P. aeruginosa</i> RD0    | Tc <sup>R</sup> , <i>P. aeruginosa</i> PA01 with pSTDesXb-Pf-10RNAP                                                                                                                                                 |
| <i>P. aeruginosa</i> RE0    | Tc <sup>R</sup> , <i>P. aeruginosa</i> PA01 with pSTDesXb-67PfluR64PPRNAP                                                                                                                                           |
| <i>P. aeruginosa</i> pX     | Gm <sup>R</sup> , <i>P. aeruginosa</i> PAO1 with genomic insertion of pBGDes- <i>BCD2</i> -msfGFP                                                                                                                   |
| <i>P. aeruginosa</i> pA0    | Gm <sup>R</sup> , <i>P. aeruginosa</i> PAO1 with genomic insertion of pBGDes- <i>P</i> <sub>T7,MCP</sub> -msfGFP                                                                                                    |
| <i>P. aeruginosa</i> pB0    | Gm <sup>R</sup> , <i>P. aeruginosa</i> PAO1 with genomic insertion of pBGDes- <i>P</i> <sub>phi15,MCP</sub> -msfGFP                                                                                                 |
| <i>P. aeruginosa</i> pC0    | Gm <sup>R</sup> , <i>P. aeruginosa</i> PAO1 with genomic insertion of pBGDes- <i>P</i> <sub>PPPL-1,MCP</sub> -msfGFP                                                                                                |
| <i>P. aeruginosa</i> pD0    | Gm <sup>R</sup> , <i>P. aeruginosa</i> PAO1 with genomic insertion of pBGDes- <i>P</i> <sub>Pf-10</sub> -msfGFP                                                                                                     |
| <i>P. aeruginosa</i> pE0    | Gm <sup>R</sup> , <i>P. aeruginosa</i> PAO1 with genomic insertion of pBGDes- <i>P</i> <sub>67PfluR64PP</sub> -msfGFP                                                                                               |
| <i>P. aeruginosa</i> pXRX   | Gm <sup>R</sup> , Tc <sup>R</sup> , <i>P. aeruginosa</i> PA01 with genomic insertion of pBGDes- <i>BCD2</i> -msfGFP and pSTDesXb-empty                                                                              |
| <i>P. aeruginosa</i> pA0RA0 | Gm <sup>R</sup> , Tc <sup>R</sup> , <i>P. aeruginosa</i> PA01 with genomic insertion of pBGDes- <i>P</i> <sub>T7,MCP</sub> -msfGFP and pSTDesXb-T7RNAP                                                              |
| <i>P. aeruginosa</i> pA0RB0 | Gm <sup>R</sup> , Tc <sup>R</sup> , <i>P. aeruginosa</i> PA01 with genomic insertion of pBGDes- <i>P</i> <sub>phi15,MCP</sub> -msfGFP and pSTDesXb-phi15RNAP                                                        |
| <i>P. aeruginosa</i> pA0RC0 | Gm <sup>R</sup> , Tc <sup>R</sup> , <i>P. aeruginosa</i> PA01 with genomic insertion of pBGDes- <i>P</i> <sub>PPPL-1,MCP</sub> -msfGFP and pSTDesXb-PPPL-1RNAP                                                      |
| <i>P. aeruginosa</i> pA0RD0 | Gm <sup>R</sup> , Tc <sup>R</sup> , <i>P. aeruginosa</i> PA01 with genomic insertion of pBGDes- <i>P</i> <sub>Pf-10,MCP</sub> -msfGFP and pSTDesXb-Pf-10RNAP                                                        |
| <i>P. aeruginosa</i> pA0RE0 | Gm <sup>R</sup> , Tc <sup>R</sup> , <i>P. aeruginosa</i> PA01 with genomic insertion of pBGDes- <i>P</i> <sub>67PfluR64PP, MCP</sub> -msfGFP and pSTDesXb-67PfluR64PPRNAP                                           |
| <i>P. aeruginosa</i> LX     | Sm <sup>R</sup> , <i>P. aeruginosa</i> PAO1 with pSTDesR-empty                                                                                                                                                      |
| <i>P. aeruginosa</i> LA0    | Sm <sup>R</sup> , <i>P. aeruginosa</i> PAO1 with pSTDesR-T7lys                                                                                                                                                      |

| Name <sup>1</sup>                 | Description                                                                                                                                                                                                        |
|-----------------------------------|--------------------------------------------------------------------------------------------------------------------------------------------------------------------------------------------------------------------|
| <i>P. aeruginosa</i> LB0          | Sm <sup>R</sup> , <i>P. aeruginosa</i> PAO1 with pSTDesR-phi15lys                                                                                                                                                  |
| <i>P. aeruginosa</i> LC0          | Sm <sup>R</sup> , <i>P. aeruginosa</i> PAO1 with pSTDesR-PPPL-1lys                                                                                                                                                 |
| <i>P. aeruginosa</i> LD0          | Sm <sup>R</sup> , <i>P. aeruginosa</i> PAO1 with pSTDesR-Pf-10lys                                                                                                                                                  |
| <i>P. aeruginosa</i> LE0          | Sm <sup>R</sup> , <i>P. aeruginosa</i> PAO1 with pSTDesR-67PfluR64PPlys                                                                                                                                            |
| <i>P. aeruginosa</i> pXRXLX       | Gm <sup>R</sup> , Tc <sup>R</sup> , Sm <sup>R</sup> , <i>P. aeruginosa</i> PAO1 with genomic insertion of pBGDes-BCD2-msfGFP, pSTDesXb-empty and pSTDesR-empty                                                     |
| <i>P. aeruginosa</i><br>pA0RA0LA0 | Gm <sup>R</sup> , Tc <sup>R</sup> , Sm <sup>R</sup> , <i>P. aeruginosa</i> PAO1 with genomic insertion of pBGDes- <i>P</i> <sub>T7,MCP</sub> -msfGFP, pSTDesXb-T7RNAP and pSTDesR-T7lys                            |
| <i>P. aeruginosa</i> pB0RB0LB0    | Gm <sup>R</sup> , Tc <sup>R</sup> , Sm <sup>R</sup> , <i>P. aeruginosa</i> PAO1 with genomic insertion of pBGDes- <i>P</i> <sub>phi15,MCP</sub> -msfGFP, pSTDesXb-phi15RNAP and pSTDesR-phi15lys                   |
| <i>P. aeruginosa</i> pB0RB0LB4    | Gm <sup>R</sup> , Tc <sup>R</sup> , Sm <sup>R</sup> , <i>P. aeruginosa</i> PAO1 with genomic insertion of pBGDes- <i>P</i> <sub>phi15,MCP</sub> -msfGFP, pSTDesXb-phi15RNAP and pSTDesR-phi15lys(G3RQ)             |
| <i>P. aeruginosa</i> pC0RC0LC0    | Gm <sup>R</sup> , Tc <sup>R</sup> , Sm <sup>R</sup> , <i>P. aeruginosa</i> PAO1 with genomic insertion of pBGDes- <i>P</i> <sub>PPPL-1,MCP</sub> -msfGFP, pSTDesXb-PPPL-1RNAP and pSTDesR-PPPL-1lys                |
| <i>P. aeruginosa</i><br>pD0RD0LD0 | Gm <sup>R</sup> , Tc <sup>R</sup> , Sm <sup>R</sup> , <i>P. aeruginosa</i> PAO1 with genomic insertion of pBGDes- <i>P</i> <sub>Pf10,MCP</sub> -msfGFP, pSTDesXb-Pf-10RNAP and pSTDesR-Pf-10lys                    |
| <i>P. aeruginosa</i> pE0RE0LE0    | Gm <sup>R</sup> , Tc <sup>R</sup> , Sm <sup>R</sup> , <i>P. aeruginosa</i> PAO1 with genomic insertion of pBGDes- <i>P</i> <sub>67PfluR64PP,MCP</sub> -msfGFP, pSTDesXb-67PfluR64PPRNAP and pSTDesR-67PfluR64PPlys |
| <i>P. aeruginosa</i> pB0RB0GD0    | Gm <sup>R</sup> , Tc <sup>R</sup> , Sm <sup>R</sup> , <i>P. aeruginosa</i> PAO1 with genomic insertion of pBGDes- <i>P</i> <sub>phi15,MCP</sub> -msfGFP, pSTDesXb-phi15RNAP and pSTDesR-empty                      |
| <i>P. aeruginosa</i> pB0RB0GD1    | Gm <sup>R</sup> , Tc <sup>R</sup> , Sm <sup>R</sup> , <i>P. aeruginosa</i> PAO1 with genomic insertion of pBGDes- <i>P</i> <sub>phi15,MCP</sub> -msfGFP, pSTDesXb-phi15RNAP and pSTDesR-LUZ24gp9                   |
| <i>P. aeruginosa</i> pB0RB0GD2    | Gm <sup>R</sup> , Tc <sup>R</sup> , Sm <sup>R</sup> , <i>P. aeruginosa</i> PAO1 with genomic insertion of pBGDes- <i>P</i> <sub>phi15,MCP</sub> -msfGFP, pSTDesXb-phi15RNAP and pSTDesR-LUZ19gp28                  |
| <i>P. aeruginosa</i> pB0RB0GD3    | Gm <sup>R</sup> , Tc <sup>R</sup> , Sm <sup>R</sup> , <i>P. aeruginosa</i> PAO1 with genomic insertion of pBGDes- <i>P</i> <sub>phi15,MCP</sub> -msfGFP, pSTDesXb-phi15RNAP and pSTDesR-phi15gp16                  |

Table S3: All pairwise comparisons using Student's t-test for the cross-recognition assay between phage promoters and RNAPs. This data is summarized in a connecting letters report in Table S5. CL: confidence limit

| Promoter-RNAP 1 | Promoter-RNAP 2         | Difference | Std Err Dif | Lower CL | Upper CL | p-Value |
|-----------------|-------------------------|------------|-------------|----------|----------|---------|
| T7 T7           | phi15 Pf-10             | 2058,43    | 72,51       | 1913,98  | 2202,88  | <,0001  |
| T7 T7           | phi15 PPPL-1            | 2058,40    | 72,51       | 1913,95  | 2202,85  | <,0001  |
| T7 T7           | 67PfluR64PP PPPL-1      | 2056,65    | 72,51       | 1912,20  | 2201,10  | <,0001  |
| T7 T7           | PPPL-1 67PfluR64PP      | 2053,45    | 72,51       | 1908,99  | 2197,90  | <,0001  |
| T7 T7           | phi15 67PfluR64PP       | 2053,33    | 72,51       | 1908,88  | 2197,78  | <,0001  |
| T7 T7           | 67PfluR64PP phi15       | 2052,99    | 72,51       | 1908,53  | 2197,44  | <,0001  |
| T7 T7           | Pf-10 T7                | 2052,06    | 72,51       | 1907,61  | 2196,51  | <,0001  |
| T7 T7           | PPPL-1 Pf-10            | 2050,17    | 72,51       | 1905,72  | 2194,63  | <,0001  |
| T7 T7           | phi15 T7                | 2048,10    | 72,51       | 1903,65  | 2192,55  | <,0001  |
| T7 T7           | 67PfluR64PP Pf-10       | 2045,24    | 72,51       | 1900,79  | 2189,69  | <,0001  |
| T7 T7           | PPPL-1 phi15            | 2044,75    | 72,51       | 1900,30  | 2189,20  | <,0001  |
| T7 T7           | T7 Pf-10                | 2039,53    | 72,51       | 1895,08  | 2183,98  | <,0001  |
| T7 T7           | 67PfluR64PP 67PfluR64PP | 2038,37    | 72,51       | 1893,91  | 2182,82  | <,0001  |
| T7 T7           | T7 67PfluR64PP          | 2037,92    | 72,51       | 1893,47  | 2182,38  | <,0001  |
| T7 T7           | Pf-10 67PfluR64PP       | 2034,65    | 72,51       | 1890,20  | 2179,10  | <,0001  |
| T7 T7           | Pf-10 phi15             | 2031,17    | 72,51       | 1886,71  | 2175,62  | <,0001  |
| T7 T7           | PPPL-1 T7               | 2031,07    | 72,51       | 1886,61  | 2175,52  | <,0001  |
| T7 T7           | Pf-10 PPPL-1            | 2024,45    | 72,51       | 1880,00  | 2168,91  | <,0001  |
| T7 T7           | T7 PPPL-1               | 2020,54    | 72,51       | 1876,08  | 2164,99  | <,0001  |
| T7 T7           | 67PfluR64PP T7          | 2018,68    | 72,51       | 1874,22  | 2163,13  | <,0001  |
| T7 T7           | T7 phi15                | 1974,81    | 72,51       | 1830,36  | 2119,26  | <,0001  |
| T7 T7           | Pf-10 Pf-10             | 1871,48    | 72,51       | 1727,03  | 2015,93  | <,0001  |
| T7 T7           | PPPL-1 PPPL-1           | 1814,85    | 72,51       | 1670,40  | 1959,30  | <,0001  |
| T7 T7           | phi15 phi15             | 1400,19    | 72,51       | 1255,74  | 1544,64  | <,0001  |
| phi15 phi15     | phi15 Pf-10             | 658,24     | 72,51       | 513,79   | 802,70   | <,0001  |
| phi15 phi15     | phi15 PPPL-1            | 658,21     | 72,51       | 513,76   | 802,66   | <,0001  |
| phi15 phi15     | 67PfluR64PP PPPL-1      | 656,46     | 72,51       | 512,01   | 800,91   | <,0001  |

| Promoter-RNAP 1 | Promoter-RNAP 2         | Difference | Std Err Dif | Lower CL | Upper CL | p-Value |
|-----------------|-------------------------|------------|-------------|----------|----------|---------|
| phi15 phi15     | PPPL-1 67PfluR64PP      | 653,26     | 72,51       | 508,81   | 797,71   | <,0001  |
| phi15 phi15     | phi15 67PfluR64PP       | 653,14     | 72,51       | 508,69   | 797,59   | <,0001  |
| phi15 phi15     | 67PfluR64PP phi15       | 652,80     | 72,51       | 508,35   | 797,25   | <,0001  |
| phi15 phi15     | Pf-10 T7                | 651,87     | 72,51       | 507,42   | 796,32   | <,0001  |
| phi15 phi15     | PPPL-1 Pf-10            | 649,99     | 72,51       | 505,53   | 794,44   | <,0001  |
| phi15 phi15     | phi15 T7                | 647,92     | 72,51       | 503,46   | 792,37   | <,0001  |
| phi15 phi15     | 67PfluR64PP Pf-10       | 645,06     | 72,51       | 500,60   | 789,51   | <,0001  |
| phi15 phi15     | PPPL-1 phi15            | 644,56     | 72,51       | 500,11   | 789,01   | <,0001  |
| phi15 phi15     | T7 Pf-10                | 639,34     | 72,51       | 494,89   | 783,79   | <,0001  |
| phi15 phi15     | 67PfluR64PP 67PfluR64PP | 638,18     | 72,51       | 493,73   | 782,63   | <,0001  |
| phi15 phi15     | T7 67PfluR64PP          | 637,74     | 72,51       | 493,28   | 782,19   | <,0001  |
| phi15 phi15     | Pf-10 67PfluR64PP       | 634,46     | 72,51       | 490,01   | 778,92   | <,0001  |
| phi15 phi15     | Pf-10 phi15             | 630,98     | 72,51       | 486,53   | 775,43   | <,0001  |
| phi15 phi15     | PPPL-1 T7               | 630,88     | 72,51       | 486,43   | 775,33   | <,0001  |
| phi15 phi15     | Pf-10 PPPL-1            | 624,27     | 72,51       | 479,81   | 768,72   | <,0001  |
| phi15 phi15     | T7 PPPL-1               | 620,35     | 72,51       | 475,90   | 764,80   | <,0001  |
| phi15 phi15     | 67PfluR64PP T7          | 618,49     | 72,51       | 474,04   | 762,94   | <,0001  |
| phi15 phi15     | T7 phi15                | 574,62     | 72,51       | 430,17   | 719,07   | <,0001  |
| phi15 phi15     | Pf-10 Pf-10             | 471,29     | 72,51       | 326,84   | 615,74   | <,0001  |
| phi15 phi15     | PPPL-1 PPPL-1           | 414,66     | 72,51       | 270,21   | 559,11   | <,0001  |
| PPPL-1 PPPL-1   | phi15 Pf-10             | 243,59     | 72,51       | 99,13    | 388,04   | 0,0012  |
| PPPL-1 PPPL-1   | phi15 PPPL-1            | 243,55     | 72,51       | 99,10    | 388,00   | 0,0012  |
| PPPL-1 PPPL-1   | 67PfluR64PP PPPL-1      | 241,80     | 72,51       | 97,35    | 386,25   | 0,0013  |
| PPPL-1 PPPL-1   | PPPL-1 67PfluR64PP      | 238,60     | 72,51       | 94,15    | 383,05   | 0,0015  |
| PPPL-1 PPPL-1   | phi15 67PfluR64PP       | 238,48     | 72,51       | 94,03    | 382,93   | 0,0015  |
| PPPL-1 PPPL-1   | 67PfluR64PP phi15       | 238,14     | 72,51       | 93,69    | 382,59   | 0,0016  |
| PPPL-1 PPPL-1   | Pf-10 T7                | 237,21     | 72,51       | 92,76    | 381,67   | 0,0016  |
| PPPL-1 PPPL-1   | PPPL-1 Pf-10            | 235,33     | 72,51       | 90,88    | 379,78   | 0,0018  |
| PPPL-1 PPPL-1   | phi15 T7                | 233,26     | 72,51       | 88,80    | 377,71   | 0,0019  |
| PPPL-1 PPPL-1   | 67PfluR64PP Pf-10       | 230,40     | 72,51       | 85,94    | 374,85   | 0,0022  |

| Promoter-RNAP 1 | Promoter-RNAP 2         | Difference | Std Err Dif | Lower CL | Upper CL | p-Value |
|-----------------|-------------------------|------------|-------------|----------|----------|---------|
| PPPL-1 PPPL-1   | PPPL-1 phi15            | 229,90     | 72,51       | 85,45    | 374,35   | 0,0022  |
| PPPL-1 PPPL-1   | T7 Pf-10                | 224,68     | 72,51       | 80,23    | 369,13   | 0,0027  |
| PPPL-1 PPPL-1   | 67PfluR64PP 67PfluR64PP | 223,52     | 72,51       | 79,07    | 367,97   | 0,0029  |
| PPPL-1 PPPL-1   | T7 67PfluR64PP          | 223,08     | 72,51       | 78,62    | 367,53   | 0,0029  |
| PPPL-1 PPPL-1   | Pf-10 67PfluR64PP       | 219,80     | 72,51       | 75,35    | 364,26   | 0,0033  |
| PPPL-1 PPPL-1   | Pf-10 phi15             | 216,32     | 72,51       | 71,87    | 360,77   | 0,0038  |
| PPPL-1 PPPL-1   | PPPL-1 T7               | 216,22     | 72,51       | 71,77    | 360,67   | 0,0039  |
| PPPL-1 PPPL-1   | Pf-10 PPPL-1            | 209,61     | 72,51       | 65,16    | 354,06   | 0,005   |
| PPPL-1 PPPL-1   | T7 PPPL-1               | 205,69     | 72,51       | 61,24    | 350,14   | 0,0059  |
| PPPL-1 PPPL-1   | 67PfluR64PP T7          | 203,83     | 72,51       | 59,38    | 348,28   | 0,0063  |
| Pf-10 Pf-10     | phi15 Pf-10             | 186,95     | 72,51       | 42,50    | 331,41   | 0,0119  |
| Pf-10 Pf-10     | phi15 PPPL-1            | 186,92     | 72,51       | 42,47    | 331,37   | 0,0119  |
| Pf-10 Pf-10     | 67PfluR64PP PPPL-1      | 185,17     | 72,51       | 40,72    | 329,62   | 0,0127  |
| Pf-10 Pf-10     | PPPL-1 67PfluR64PP      | 181,97     | 72,51       | 37,52    | 326,42   | 0,0142  |
| Pf-10 Pf-10     | phi15 67PfluR64PP       | 181,85     | 72,51       | 37,40    | 326,30   | 0,0143  |
| Pf-10 Pf-10     | 67PfluR64PP phi15       | 181,51     | 72,51       | 37,06    | 325,96   | 0,0145  |
| Pf-10 Pf-10     | Pf-10 T7                | 180,58     | 72,51       | 36,13    | 325,03   | 0,015   |
| Pf-10 Pf-10     | PPPL-1 Pf-10            | 178,70     | 72,51       | 34,24    | 323,15   | 0,016   |
| Pf-10 Pf-10     | phi15 T7                | 176,63     | 72,51       | 32,17    | 321,08   | 0,0172  |
| Pf-10 Pf-10     | 67PfluR64PP Pf-10       | 173,77     | 72,51       | 29,31    | 318,22   | 0,0191  |
| Pf-10 Pf-10     | PPPL-1 phi15            | 173,27     | 72,51       | 28,82    | 317,72   | 0,0194  |
| Pf-10 Pf-10     | T7 Pf-10                | 168,05     | 72,51       | 23,60    | 312,50   | 0,0232  |
| Pf-10 Pf-10     | 67PfluR64PP 67PfluR64PP | 166,89     | 72,51       | 22,44    | 311,34   | 0,0241  |
| Pf-10 Pf-10     | T7 67PfluR64PP          | 166,45     | 72,51       | 21,99    | 310,90   | 0,0245  |
| Pf-10 Pf-10     | Pf-10 67PfluR64PP       | 163,17     | 72,51       | 18,72    | 307,63   | 0,0274  |
| PPPL-1 PPPL-1   | T7 phi15                | 159,96     | 72,51       | 15,51    | 304,41   | 0,0304  |
| Pf-10 Pf-10     | Pf-10 phi15             | 159,69     | 72,51       | 15,24    | 304,14   | 0,0307  |
| Pf-10 Pf-10     | PPPL-1 T7               | 159,59     | 72,51       | 15,14    | 304,04   | 0,0308  |
| Pf-10 Pf-10     | Pf-10 PPPL-1            | 152,98     | 72,51       | 8,52     | 297,43   | 0,0382  |
| Pf-10 Pf-10     | T7 PPPL-1               | 149,06     | 72,51       | 4,61     | 293,51   | 0,0433  |

| Promoter-RNAP 1 | Promoter-RNAP 2         | Difference | Std Err Dif | Lower CL | Upper CL | p-Value |
|-----------------|-------------------------|------------|-------------|----------|----------|---------|
| Pf-10 Pf-10     | 67PfluR64PP T7          | 147,20     | 72,51       | 2,75     | 291,65   | 0,0459  |
| Pf-10 Pf-10     | T7 phi15                | 103,33     | 72,51       | -41,12   | 247,78   | 0,1583  |
| T7 phi15        | phi15 Pf-10             | 83,62      | 72,51       | -60,83   | 228,08   | 0,2525  |
| T7 phi15        | phi15 PPPL-1            | 83,59      | 72,51       | -60,86   | 228,04   | 0,2527  |
| T7 phi15        | 67PfluR64PP PPPL-1      | 81,84      | 72,51       | -62,61   | 226,29   | 0,2626  |
| T7 phi15        | PPPL-1 67PfluR64PP      | 78,64      | 72,51       | -65,81   | 223,09   | 0,2816  |
| T7 phi15        | phi15 67PfluR64PP       | 78,52      | 72,51       | -65,93   | 222,97   | 0,2824  |
| T7 phi15        | 67PfluR64PP phi15       | 78,18      | 72,51       | -66,28   | 222,63   | 0,2844  |
| T7 phi15        | Pf-10 T7                | 77,25      | 72,51       | -67,20   | 221,70   | 0,2901  |
| T7 phi15        | PPPL-1 Pf-10            | 75,37      | 72,51       | -69,09   | 219,82   | 0,302   |
| T7 phi15        | phi15 T7                | 73,29      | 72,51       | -71,16   | 217,75   | 0,3154  |
| T7 phi15        | 67PfluR64PP Pf-10       | 70,43      | 72,51       | -74,02   | 214,89   | 0,3345  |
| T7 phi15        | PPPL-1 phi15            | 69,94      | 72,51       | -74,51   | 214,39   | 0,3379  |
| T7 phi15        | T7 Pf-10                | 64,72      | 72,51       | -79,73   | 209,17   | 0,375   |
| T7 phi15        | 67PfluR64PP 67PfluR64PP | 63,56      | 72,51       | -80,89   | 208,01   | 0,3836  |
| T7 phi15        | T7 67PfluR64PP          | 63,11      | 72,51       | -81,34   | 207,57   | 0,3869  |
| T7 phi15        | Pf-10 67PfluR64PP       | 59,84      | 72,51       | -84,61   | 204,29   | 0,4118  |
| PPPL-1 PPPL-1   | Pf-10 Pf-10             | 56,63      | 72,51       | -87,82   | 201,08   | 0,4373  |
| T7 phi15        | Pf-10 phi15             | 56,36      | 72,51       | -88,10   | 200,81   | 0,4395  |
| T7 phi15        | PPPL-1 T7               | 56,26      | 72,51       | -88,19   | 200,71   | 0,4403  |
| T7 phi15        | Pf-10 PPPL-1            | 49,65      | 72,51       | -94,81   | 194,10   | 0,4957  |
| T7 phi15        | T7 PPPL-1               | 45,73      | 72,51       | -98,73   | 190,18   | 0,5302  |
| T7 phi15        | 67PfluR64PP T7          | 43,87      | 72,51       | -100,58  | 188,32   | 0,547   |
| 67PfluR64PP T7  | phi15 Pf-10             | 39,76      | 72,51       | -104,70  | 184,21   | 0,5851  |
| 67PfluR64PP T7  | phi15 PPPL-1            | 39,72      | 72,51       | -104,73  | 184,18   | 0,5854  |
| 67PfluR64PP T7  | 67PfluR64PP PPPL-1      | 37,97      | 72,51       | -106,48  | 182,43   | 0,602   |
| T7 PPPL-1       | phi15 Pf-10             | 37,90      | 72,51       | -106,55  | 182,35   | 0,6028  |
| T7 PPPL-1       | phi15 PPPL-1            | 37,87      | 72,51       | -106,59  | 182,32   | 0,6031  |
| T7 PPPL-1       | 67PfluR64PP PPPL-1      | 36,12      | 72,51       | -108,34  | 180,57   | 0,6199  |
| 67PfluR64PP T7  | PPPL-1 67PfluR64PP      | 34,77      | 72,51       | -109,68  | 179,22   | 0,633   |



| Promoter-RNAP 1   | Promoter-RNAP 2    | Difference | Std Err Dif | Lower CL | Upper CL | p-Value |
|-------------------|--------------------|------------|-------------|----------|----------|---------|
| 67PfluR64PP T7    | phi15 67PfluR64PP  | 34,65      | 72,51       | -109,80  | 179,10   | 0,6341  |
| 67PfluR64PP T7    | 67PfluR64PP phi15  | 34,31      | 72,51       | -110,14  | 178,76   | 0,6375  |
| Pf-10 PPPL-1      | phi15 Pf-10        | 33,98      | 72,51       | -110,47  | 178,43   | 0,6407  |
| Pf-10 PPPL-1      | phi15 PPPL-1       | 33,95      | 72,51       | -110,51  | 178,40   | 0,641   |
| 67PfluR64PP T7    | Pf-10 T7           | 33,39      | 72,51       | -111,07  | 177,84   | 0,6466  |
| T7 PPPL-1         | PPPL-1 67PfluR64PP | 32,91      | 72,51       | -111,54  | 177,36   | 0,6512  |
| T7 PPPL-1         | phi15 67PfluR64PP  | 32,79      | 72,51       | -111,66  | 177,24   | 0,6524  |
| T7 PPPL-1         | 67PfluR64PP phi15  | 32,45      | 72,51       | -112,00  | 176,90   | 0,6558  |
| Pf-10 PPPL-1      | 67PfluR64PP PPPL-1 | 32,20      | 72,51       | -112,26  | 176,65   | 0,6583  |
| T7 PPPL-1         | Pf-10 T7           | 31,53      | 72,51       | -112,93  | 175,98   | 0,665   |
| 67PfluR64PP T7    | PPPL-1 Pf-10       | 31,50      | 72,51       | -112,95  | 175,95   | 0,6653  |
| T7 PPPL-1         | PPPL-1 Pf-10       | 29,64      | 72,51       | -114,81  | 174,09   | 0,6839  |
| 67PfluR64PP T7    | phi15 T7           | 29,43      | 72,51       | -115,02  | 173,88   | 0,686   |
| Pf-10 PPPL-1      | PPPL-1 67PfluR64PP | 28,99      | 72,51       | -115,46  | 173,44   | 0,6904  |
| Pf-10 PPPL-1      | phi15 67PfluR64PP  | 28,87      | 72,51       | -115,58  | 173,33   | 0,6916  |
| Pf-10 PPPL-1      | 67PfluR64PP phi15  | 28,53      | 72,51       | -115,92  | 172,98   | 0,6951  |
| Pf-10 PPPL-1      | Pf-10 T7           | 27,61      | 72,51       | -116,84  | 172,06   | 0,7045  |
| T7 PPPL-1         | phi15 T7           | 27,57      | 72,51       | -116,88  | 172,02   | 0,7049  |
| PPPL-1 T7         | phi15 Pf-10        | 27,37      | 72,51       | -117,09  | 171,82   | 0,7069  |
| PPPL-1 T7         | phi15 PPPL-1       | 27,33      | 72,51       | -117,12  | 171,79   | 0,7073  |
| Pf-10 phi15       | phi15 Pf-10        | 27,27      | 72,51       | -117,18  | 171,72   | 0,708   |
| Pf-10 phi15       | phi15 PPPL-1       | 27,24      | 72,51       | -117,22  | 171,69   | 0,7083  |
| 67PfluR64PP T7    | 67PfluR64PP Pf-10  | 26,57      | 72,51       | -117,89  | 171,02   | 0,7151  |
| 67PfluR64PP T7    | PPPL-1 phi15       | 26,07      | 72,51       | -118,38  | 170,53   | 0,7202  |
| Pf-10 PPPL-1      | PPPL-1 Pf-10       | 25,72      | 72,51       | -118,73  | 170,17   | 0,7238  |
| PPPL-1 T7         | 67PfluR64PP PPPL-1 | 25,58      | 72,51       | -118,87  | 170,04   | 0,7252  |
| Pf-10 phi15       | 67PfluR64PP PPPL-1 | 25,49      | 72,51       | -118,97  | 169,94   | 0,7262  |
| T7 PPPL-1         | 67PfluR64PP Pf-10  | 24,71      | 72,51       | -119,74  | 169,16   | 0,7343  |
| T7 PPPL-1         | PPPL-1 phi15       | 24,22      | 72,51       | -120,24  | 168,67   | 0,7394  |
| Pf-10 67PfluR64PP | phi15 Pf-10        | 23,78      | 72,51       | -120,67  | 168,23   | 0,7439  |

| Promoter-RNAP 1         | Promoter-RNAP 2         | Difference | Std Err Dif | Lower CL | Upper CL | p-Value |
|-------------------------|-------------------------|------------|-------------|----------|----------|---------|
| Pf-10 67PfluR64PP       | phi15 PPPL-1            | 23,75      | 72,51       | -120,70  | 168,20   | 0,7442  |
| Pf-10 PPPL-1            | phi15 T7                | 23,65      | 72,51       | -120,80  | 168,10   | 0,7452  |
| PPPL-1 T7               | PPPL-1 67PfluR64PP      | 22,38      | 72,51       | -122,07  | 166,83   | 0,7585  |
| Pf-10 phi15             | PPPL-1 67PfluR64PP      | 22,28      | 72,51       | -122,17  | 166,73   | 0,7595  |
| PPPL-1 T7               | phi15 67PfluR64PP       | 22,26      | 72,51       | -122,19  | 166,71   | 0,7597  |
| Pf-10 phi15             | phi15 67PfluR64PP       | 22,16      | 72,51       | -122,29  | 166,61   | 0,7607  |
| Pf-10 67PfluR64PP       | 67PfluR64PP PPPL-1      | 22,00      | 72,51       | -122,45  | 166,45   | 0,7624  |
| PPPL-1 T7               | 67PfluR64PP phi15       | 21,92      | 72,51       | -122,53  | 166,37   | 0,7633  |
| Pf-10 phi15             | 67PfluR64PP phi15       | 21,82      | 72,51       | -122,63  | 166,27   | 0,7643  |
| PPPL-1 T7               | Pf-10 T7                | 21,00      | 72,51       | -123,46  | 165,45   | 0,773   |
| Pf-10 phi15             | Pf-10 T7                | 20,90      | 72,51       | -123,56  | 165,35   | 0,774   |
| 67PfluR64PP T7          | T7 Pf-10                | 20,85      | 72,51       | -123,60  | 165,30   | 0,7745  |
| Pf-10 PPPL-1            | 67PfluR64PP Pf-10       | 20,79      | 72,51       | -123,66  | 165,24   | 0,7751  |
| T7 67PfluR64PP          | phi15 Pf-10             | 20,51      | 72,51       | -123,94  | 164,96   | 0,7781  |
| T7 67PfluR64PP          | phi15 PPPL-1            | 20,48      | 72,51       | -123,97  | 164,93   | 0,7784  |
| Pf-10 PPPL-1            | PPPL-1 phi15            | 20,30      | 72,51       | -124,16  | 164,75   | 0,7803  |
| 67PfluR64PP 67PfluR64PP | phi15 Pf-10             | 20,07      | 72,51       | -124,39  | 164,52   | 0,7828  |
| 67PfluR64PP 67PfluR64PP | phi15 PPPL-1            | 20,03      | 72,51       | -124,42  | 164,49   | 0,7831  |
| 67PfluR64PP T7          | 67PfluR64PP 67PfluR64PP | 19,69      | 72,51       | -124,76  | 164,14   | 0,7867  |
| 67PfluR64PP T7          | T7 67PfluR64PP          | 19,25      | 72,51       | -125,20  | 163,70   | 0,7914  |
| PPPL-1 T7               | PPPL-1 Pf-10            | 19,11      | 72,51       | -125,34  | 163,56   | 0,7929  |
| Pf-10 phi15             | PPPL-1 Pf-10            | 19,01      | 72,51       | -125,44  | 163,46   | 0,7939  |
| T7 PPPL-1               | T7 Pf-10                | 18,99      | 72,51       | -125,46  | 163,44   | 0,7941  |
| T7 Pf-10                | phi15 Pf-10             | 18,91      | 72,51       | -125,55  | 163,36   | 0,795   |
| T7 Pf-10                | phi15 PPPL-1            | 18,87      | 72,51       | -125,58  | 163,32   | 0,7954  |
| Pf-10 67PfluR64PP       | PPPL-1 67PfluR64PP      | 18,79      | 72,51       | -125,66  | 163,25   | 0,7962  |
| T7 67PfluR64PP          | 67PfluR64PP PPPL-1      | 18,73      | 72,51       | -125,72  | 163,18   | 0,7969  |
| Pf-10 67PfluR64PP       | phi15 67PfluR64PP       | 18,68      | 72,51       | -125,78  | 163,13   | 0,7975  |
| Pf-10 67PfluR64PP       | 67PfluR64PP phi15       | 18,33      | 72,51       | -126,12  | 162,79   | 0,8011  |
| 67PfluR64PP 67PfluR64PP | 67PfluR64PP PPPL-1      | 18,28      | 72,51       | -126,17  | 162,74   | 0,8016  |

| Promoter-RNAP 1         | Promoter-RNAP 2         | Difference | Std Err Dif | Lower CL | Upper CL | p-Value |
|-------------------------|-------------------------|------------|-------------|----------|----------|---------|
| T7 PPPL-1               | 67PfluR64PP 67PfluR64PP | 17,83      | 72,51       | -126,62  | 162,28   | 0,8064  |
| Pf-10 67PfluR64PP       | Pf-10 T7                | 17,41      | 72,51       | -127,04  | 161,86   | 0,8109  |
| T7 PPPL-1               | T7 67PfluR64PP          | 17,39      | 72,51       | -127,06  | 161,84   | 0,8111  |
| T7 Pf-10                | 67PfluR64PP PPPL-1      | 17,12      | 72,51       | -127,33  | 161,57   | 0,814   |
| PPPL-1 T7               | phi15 T7                | 17,04      | 72,51       | -127,41  | 161,49   | 0,8149  |
| Pf-10 phi15             | phi15 T7                | 16,94      | 72,51       | -127,51  | 161,39   | 0,8159  |
| 67PfluR64PP T7          | Pf-10 67PfluR64PP       | 15,98      | 72,51       | -128,48  | 160,43   | 0,8262  |
| T7 67PfluR64PP          | PPPL-1 67PfluR64PP      | 15,52      | 72,51       | -128,93  | 159,97   | 0,8311  |
| Pf-10 67PfluR64PP       | PPPL-1 Pf-10            | 15,52      | 72,51       | -128,93  | 159,97   | 0,8311  |
| T7 67PfluR64PP          | phi15 67PfluR64PP       | 15,40      | 72,51       | -129,05  | 159,86   | 0,8323  |
| 67PfluR64PP 67PfluR64PP | PPPL-1 67PfluR64PP      | 15,08      | 72,51       | -129,37  | 159,53   | 0,8358  |
| Pf-10 PPPL-1            | T7 Pf-10                | 15,07      | 72,51       | -129,38  | 159,53   | 0,8359  |
| T7 67PfluR64PP          | 67PfluR64PP phi15       | 15,06      | 72,51       | -129,39  | 159,51   | 0,836   |
| 67PfluR64PP 67PfluR64PP | phi15 67PfluR64PP       | 14,96      | 72,51       | -129,49  | 159,41   | 0,8371  |
| 67PfluR64PP 67PfluR64PP | 67PfluR64PP phi15       | 14,62      | 72,51       | -129,83  | 159,07   | 0,8408  |
| PPPL-1 T7               | 67PfluR64PP Pf-10       | 14,18      | 72,51       | -130,28  | 158,63   | 0,8455  |
| T7 67PfluR64PP          | Pf-10 T7                | 14,14      | 72,51       | -130,31  | 158,59   | 0,8459  |
| T7 PPPL-1               | Pf-10 67PfluR64PP       | 14,12      | 72,51       | -130,33  | 158,57   | 0,8462  |
| Pf-10 phi15             | 67PfluR64PP Pf-10       | 14,08      | 72,51       | -130,37  | 158,53   | 0,8466  |
| T7 Pf-10                | PPPL-1 67PfluR64PP      | 13,92      | 72,51       | -130,53  | 158,37   | 0,8483  |
| Pf-10 PPPL-1            | 67PfluR64PP 67PfluR64PP | 13,91      | 72,51       | -130,54  | 158,36   | 0,8484  |
| T7 Pf-10                | phi15 67PfluR64PP       | 13,80      | 72,51       | -130,65  | 158,25   | 0,8496  |
| 67PfluR64PP 67PfluR64PP | Pf-10 T7                | 13,69      | 72,51       | -130,76  | 158,15   | 0,8507  |
| PPPL-1 T7               | PPPL-1 phi15            | 13,68      | 72,51       | -130,77  | 158,14   | 0,8508  |
| PPPL-1 phi15            | phi15 Pf-10             | 13,68      | 72,51       | -130,77  | 158,13   | 0,8508  |
| PPPL-1 phi15            | phi15 PPPL-1            | 13,65      | 72,51       | -130,80  | 158,10   | 0,8512  |
| Pf-10 phi15             | PPPL-1 phi15            | 13,59      | 72,51       | -130,87  | 158,04   | 0,8519  |
| Pf-10 PPPL-1            | T7 67PfluR64PP          | 13,47      | 72,51       | -130,98  | 157,92   | 0,8531  |
| T7 Pf-10                | 67PfluR64PP phi15       | 13,46      | 72,51       | -130,99  | 157,91   | 0,8533  |
| Pf-10 67PfluR64PP       | phi15 T7                | 13,45      | 72,51       | -131,00  | 157,90   | 0,8533  |

| Promoter-RNAP 1         | Promoter-RNAP 2    | Difference | Std Err Dif | Lower CL | Upper CL | p-Value |
|-------------------------|--------------------|------------|-------------|----------|----------|---------|
| 67PfluR64PP Pf-10       | phi15 Pf-10        | 13,19      | 72,51       | -131,26  | 157,64   | 0,8562  |
| 67PfluR64PP Pf-10       | phi15 PPPL-1       | 13,16      | 72,51       | -131,29  | 157,61   | 0,8565  |
| T7 Pf-10                | Pf-10 T7           | 12,53      | 72,51       | -131,92  | 156,99   | 0,8632  |
| 67PfluR64PP T7          | Pf-10 phi15        | 12,49      | 72,51       | -131,96  | 156,94   | 0,8637  |
| 67PfluR64PP T7          | PPPL-1 T7          | 12,39      | 72,51       | -132,06  | 156,84   | 0,8648  |
| T7 67PfluR64PP          | PPPL-1 Pf-10       | 12,25      | 72,51       | -132,20  | 156,70   | 0,8663  |
| PPPL-1 phi15            | 67PfluR64PP PPPL-1 | 11,90      | 72,51       | -132,55  | 156,35   | 0,8701  |
| 67PfluR64PP 67PfluR64PP | PPPL-1 Pf-10       | 11,81      | 72,51       | -132,64  | 156,26   | 0,8711  |
| 67PfluR64PP Pf-10       | 67PfluR64PP PPPL-1 | 11,41      | 72,51       | -133,04  | 155,86   | 0,8754  |
| T7 Pf-10                | PPPL-1 Pf-10       | 10,65      | 72,51       | -133,80  | 155,10   | 0,8837  |
| T7 PPPL-1               | Pf-10 phi15        | 10,63      | 72,51       | -133,82  | 155,08   | 0,8838  |
| Pf-10 67PfluR64PP       | 67PfluR64PP Pf-10  | 10,59      | 72,51       | -133,86  | 155,04   | 0,8843  |
| T7 PPPL-1               | PPPL-1 T7          | 10,53      | 72,51       | -133,92  | 154,98   | 0,8849  |
| phi15 T7                | phi15 Pf-10        | 10,33      | 72,51       | -134,12  | 154,78   | 0,8871  |
| phi15 T7                | phi15 PPPL-1       | 10,30      | 72,51       | -134,15  | 154,75   | 0,8875  |
| Pf-10 PPPL-1            | Pf-10 67PfluR64PP  | 10,20      | 72,51       | -134,25  | 154,65   | 0,8885  |
| T7 67PfluR64PP          | phi15 T7           | 10,18      | 72,51       | -134,27  | 154,63   | 0,8887  |
| Pf-10 67PfluR64PP       | PPPL-1 phi15       | 10,10      | 72,51       | -134,35  | 154,55   | 0,8896  |
| 67PfluR64PP 67PfluR64PP | phi15 T7           | 9,74       | 72,51       | -134,71  | 154,19   | 0,8935  |
| PPPL-1 phi15            | PPPL-1 67PfluR64PP | 8,70       | 72,51       | -135,76  | 153,15   | 0,9049  |
| PPPL-1 phi15            | phi15 67PfluR64PP  | 8,58       | 72,51       | -135,87  | 153,03   | 0,9062  |
| T7 Pf-10                | phi15 T7           | 8,58       | 72,51       | -135,88  | 153,03   | 0,9062  |
| phi15 T7                | 67PfluR64PP PPPL-1 | 8,55       | 72,51       | -135,90  | 153,00   | 0,9065  |
| PPPL-1 T7               | T7 Pf-10           | 8,46       | 72,51       | -135,99  | 152,91   | 0,9074  |
| Pf-10 phi15             | T7 Pf-10           | 8,36       | 72,51       | -136,09  | 152,81   | 0,9085  |
| PPPL-1 Pf-10            | phi15 Pf-10        | 8,26       | 72,51       | -136,19  | 152,71   | 0,9096  |
| PPPL-1 phi15            | 67PfluR64PP phi15  | 8,24       | 72,51       | -136,22  | 152,69   | 0,9099  |
| PPPL-1 Pf-10            | phi15 PPPL-1       | 8,23       | 72,51       | -136,23  | 152,68   | 0,91    |
| 67PfluR64PP Pf-10       | PPPL-1 67PfluR64PP | 8,20       | 72,51       | -136,25  | 152,66   | 0,9102  |
| 67PfluR64PP Pf-10       | phi15 67PfluR64PP  | 8,09       | 72,51       | -136,37  | 152,54   | 0,9115  |

| Promoter-RNAP 1         | Promoter-RNAP 2         | Difference | Std Err Dif | Lower CL | Upper CL | p-Value |
|-------------------------|-------------------------|------------|-------------|----------|----------|---------|
| 67PfluR64PP Pf-10       | 67PfluR64PP phi15       | 7,74       | 72,51       | -136,71  | 152,20   | 0,9152  |
| T7 67PfluR64PP          | 67PfluR64PP Pf-10       | 7,32       | 72,51       | -137,13  | 151,77   | 0,9199  |
| PPPL-1 phi15            | Pf-10 T7                | 7,31       | 72,51       | -137,14  | 151,76   | 0,92    |
| PPPL-1 T7               | 67PfluR64PP 67PfluR64PP | 7,30       | 72,51       | -137,15  | 151,75   | 0,9201  |
| Pf-10 phi15             | 67PfluR64PP 67PfluR64PP | 7,20       | 72,51       | -137,25  | 151,65   | 0,9212  |
| 67PfluR64PP 67PfluR64PP | 67PfluR64PP Pf-10       | 6,88       | 72,51       | -137,58  | 151,33   | 0,9247  |
| PPPL-1 T7               | T7 67PfluR64PP          | 6,86       | 72,51       | -137,59  | 151,31   | 0,9249  |
| T7 67PfluR64PP          | PPPL-1 phi15            | 6,83       | 72,51       | -137,62  | 151,28   | 0,9252  |
| 67PfluR64PP Pf-10       | Pf-10 T7                | 6,82       | 72,51       | -137,63  | 151,27   | 0,9253  |
| Pf-10 phi15             | T7 67PfluR64PP          | 6,76       | 72,51       | -137,69  | 151,21   | 0,926   |
| Pf-10 PPPL-1            | Pf-10 phi15             | 6,71       | 72,51       | -137,74  | 151,16   | 0,9265  |
| Pf-10 PPPL-1            | PPPL-1 T7               | 6,61       | 72,51       | -137,84  | 151,06   | 0,9276  |
| PPPL-1 Pf-10            | 67PfluR64PP PPPL-1      | 6,48       | 72,51       | -137,98  | 150,93   | 0,9291  |
| 67PfluR64PP 67PfluR64PP | PPPL-1 phi15            | 6,38       | 72,51       | -138,07  | 150,84   | 0,9301  |
| Pf-10 T7                | phi15 Pf-10             | 6,37       | 72,51       | -138,08  | 150,82   | 0,9302  |
| Pf-10 T7                | phi15 PPPL-1            | 6,34       | 72,51       | -138,11  | 150,79   | 0,9306  |
| 67PfluR64PP T7          | Pf-10 PPPL-1            | 5,78       | 72,51       | -138,67  | 150,23   | 0,9367  |
| T7 Pf-10                | 67PfluR64PP Pf-10       | 5,72       | 72,51       | -138,74  | 150,17   | 0,9374  |
| 67PfluR64PP phi15       | phi15 Pf-10             | 5,45       | 72,51       | -139,00  | 149,90   | 0,9403  |
| PPPL-1 phi15            | PPPL-1 Pf-10            | 5,42       | 72,51       | -139,03  | 149,88   | 0,9406  |
| 67PfluR64PP phi15       | phi15 PPPL-1            | 5,41       | 72,51       | -139,04  | 149,87   | 0,9407  |
| phi15 T7                | PPPL-1 67PfluR64PP      | 5,34       | 72,51       | -139,11  | 149,79   | 0,9415  |
| phi15 T7                | phi15 67PfluR64PP       | 5,22       | 72,51       | -139,23  | 149,68   | 0,9428  |
| T7 Pf-10                | PPPL-1 phi15            | 5,22       | 72,51       | -139,23  | 149,67   | 0,9428  |
| phi15 67PfluR64PP       | phi15 Pf-10             | 5,11       | 72,51       | -139,35  | 149,56   | 0,9441  |
| phi15 67PfluR64PP       | phi15 PPPL-1            | 5,07       | 72,51       | -139,38  | 149,52   | 0,9444  |
| PPPL-1 67PfluR64PP      | phi15 Pf-10             | 4,99       | 72,51       | -139,47  | 149,44   | 0,9454  |
| PPPL-1 67PfluR64PP      | phi15 PPPL-1            | 4,95       | 72,51       | -139,50  | 149,41   | 0,9457  |
| 67PfluR64PP Pf-10       | PPPL-1 Pf-10            | 4,93       | 72,51       | -139,52  | 149,38   | 0,946   |
| phi15 T7                | 67PfluR64PP phi15       | 4,88       | 72,51       | -139,57  | 149,33   | 0,9465  |

| Promoter-RNAP 1         | Promoter-RNAP 2         | Difference | Std Err Dif | Lower CL | Upper CL | p-Value |
|-------------------------|-------------------------|------------|-------------|----------|----------|---------|
| Pf-10 67PfluR64PP       | T7 Pf-10                | 4,88       | 72,51       | -139,58  | 149,33   | 0,9466  |
| Pf-10 T7                | 67PfluR64PP PPPL-1      | 4,59       | 72,51       | -139,86  | 149,04   | 0,9497  |
| phi15 T7                | Pf-10 T7                | 3,96       | 72,51       | -140,49  | 148,41   | 0,9566  |
| T7 PPPL-1               | Pf-10 PPPL-1            | 3,92       | 72,51       | -140,53  | 148,37   | 0,957   |
| Pf-10 67PfluR64PP       | 67PfluR64PP 67PfluR64PP | 3,72       | 72,51       | -140,74  | 148,17   | 0,9593  |
| 67PfluR64PP phi15       | 67PfluR64PP PPPL-1      | 3,66       | 72,51       | -140,79  | 148,12   | 0,9598  |
| PPPL-1 T7               | Pf-10 67PfluR64PP       | 3,59       | 72,51       | -140,87  | 148,04   | 0,9607  |
| Pf-10 phi15             | Pf-10 67PfluR64PP       | 3,49       | 72,51       | -140,97  | 147,94   | 0,9618  |
| PPPL-1 phi15            | phi15 T7                | 3,35       | 72,51       | -141,10  | 147,80   | 0,9632  |
| phi15 67PfluR64PP       | 67PfluR64PP PPPL-1      | 3,32       | 72,51       | -141,13  | 147,77   | 0,9636  |
| PPPL-1 Pf-10            | PPPL-1 67PfluR64PP      | 3,27       | 72,51       | -141,18  | 147,72   | 0,9641  |
| Pf-10 67PfluR64PP       | T7 67PfluR64PP          | 3,27       | 72,51       | -141,18  | 147,72   | 0,9641  |
| PPPL-1 67PfluR64PP      | 67PfluR64PP PPPL-1      | 3,20       | 72,51       | -141,25  | 147,66   | 0,9649  |
| PPPL-1 Pf-10            | phi15 67PfluR64PP       | 3,15       | 72,51       | -141,30  | 147,61   | 0,9654  |
| 67PfluR64PP Pf-10       | phi15 T7                | 2,86       | 72,51       | -141,59  | 147,31   | 0,9686  |
| PPPL-1 Pf-10            | 67PfluR64PP phi15       | 2,81       | 72,51       | -141,64  | 147,26   | 0,9692  |
| phi15 T7                | PPPL-1 Pf-10            | 2,07       | 72,51       | -142,38  | 146,52   | 0,9773  |
| PPPL-1 Pf-10            | Pf-10 T7                | 1,89       | 72,51       | -142,56  | 146,34   | 0,9793  |
| 67PfluR64PP T7          | T7 PPPL-1               | 1,86       | 72,51       | -142,59  | 146,31   | 0,9796  |
| 67PfluR64PP PPPL-1      | phi15 Pf-10             | 1,78       | 72,51       | -142,67  | 146,23   | 0,9805  |
| 67PfluR64PP PPPL-1      | phi15 PPPL-1            | 1,75       | 72,51       | -142,70  | 146,20   | 0,9808  |
| T7 67PfluR64PP          | T7 Pf-10                | 1,60       | 72,51       | -142,85  | 146,06   | 0,9824  |
| Pf-10 T7                | PPPL-1 67PfluR64PP      | 1,39       | 72,51       | -143,07  | 145,84   | 0,9848  |
| Pf-10 T7                | phi15 67PfluR64PP       | 1,27       | 72,51       | -143,18  | 145,72   | 0,9861  |
| 67PfluR64PP 67PfluR64PP | T7 Pf-10                | 1,16       | 72,51       | -143,29  | 145,61   | 0,9873  |
| Pf-10 T7                | 67PfluR64PP phi15       | 0,93       | 72,51       | -143,53  | 145,38   | 0,9899  |
| PPPL-1 phi15            | 67PfluR64PP Pf-10       | 0,49       | 72,51       | -143,96  | 144,94   | 0,9946  |
| 67PfluR64PP phi15       | PPPL-1 67PfluR64PP      | 0,46       | 72,51       | -143,99  | 144,91   | 0,995   |
| T7 67PfluR64PP          | 67PfluR64PP 67PfluR64PP | 0,44       | 72,51       | -144,01  | 144,90   | 0,9951  |
| 67PfluR64PP phi15       | phi15 67PfluR64PP       | 0,34       | 72,51       | -144,11  | 144,79   | 0,9963  |

| Promoter-RNAP 1   | Promoter-RNAP 2    | Difference | Std Err Dif | Lower CL | Upper CL | p-Value |
|-------------------|--------------------|------------|-------------|----------|----------|---------|
| phi15 67PfluR64PP | PPPL-1 67PfluR64PP | 0,12       | 72,51       | -144,33  | 144,57   | 0,9987  |
| PPPL-1 T7         | Pf-10 phi15        | 0,10       | 72,51       | -144,35  | 144,55   | 0,9989  |
| phi15 PPPL-1      | phi15 Pf-10        | 0,03       | 72,51       | -144,42  | 144,48   | 0,9996  |

Table S4: Connecting letters report of a pairwise Student's *t*-test of the cross-recognition assay between phage promoters and RNAPs. Levels not connected by same letter are significantly different.

| Promoter    | RNAP        |   |   |     | Mean     |
|-------------|-------------|---|---|-----|----------|
| T7          | T7          | A |   |     | 2060,566 |
| phi15       | phi15       | B |   |     | 660,3784 |
| PPPL-1      | PPPL-1      |   | C |     | 245,7189 |
| Pf-10       | Pf-10       |   | C | D   | 189,0884 |
| T7          | phi15       |   |   | D E | 85,7572  |
| 67PfluR64PP | T7          |   |   | E   | 41,8903  |
| T7          | PPPL-1      |   |   | E   | 40,0312  |
| Pf-10       | PPPL-1      |   |   | E   | 36,1123  |
| PPPL-1      | T7          |   |   | E   | 29,5002  |
| Pf-10       | phi15       |   |   | E   | 29,4009  |
| Pf-10       | 67PfluR64PP |   |   | E   | 25,9146  |
| T7          | 67PfluR64PP |   |   | E   | 22,6429  |
| 67PfluR64PP | 67PfluR64PP |   |   | E   | 22,1996  |
| T7          | Pf-10       |   |   | E   | 21,0388  |
| PPPL-1      | phi15       |   |   | E   | 15,8159  |
| 67PfluR64PP | Pf-10       |   |   | E   | 15,3239  |
| phi15       | T7          |   |   | E   | 12,4631  |
| PPPL-1      | Pf-10       |   |   | E   | 10,3922  |
| Pf-10       | T7          |   |   | E   | 8,5055   |
| 67PfluR64PP | phi15       |   |   | E   | 7,5807   |
| phi15       | 67PfluR64PP |   |   | E   | 7,239    |
| PPPL-1      | 67PfluR64PP |   |   | E   | 7,1203   |
| 67PfluR64PP | PPPL-1      |   |   | E   | 3,9164   |
| phi15       | PPPL-1      |   |   | E   | 2,1663   |
| phi15       | Pf-10       |   |   | E   | 2,134    |
